# Supplementary material for: Transcriptome-wide characterization of the eIF4A signature highlights plasticity in translation regulation
Source: PubMed Central journal article supplement (PMC4203936; doi:10.1186/s13059-014-0476-1), 2014-10-02
Supplement: 13059_2014_476_MOESM2_ESM.pdf [file 13059_2014_476_MOESM2_ESM.pdf]

| <b>Table S1A</b>                                                          |         |                                                                                                                                                                                            |       |           |                 |            |
|---------------------------------------------------------------------------|---------|--------------------------------------------------------------------------------------------------------------------------------------------------------------------------------------------|-------|-----------|-----------------|------------|
| <b>Peptides discovered by mass spectrometry of monosome pellet   DMSO</b> |         |                                                                                                                                                                                            |       |           |                 |            |
| Rank                                                                      | Protein | Description                                                                                                                                                                                | Score | Mass (Da) | No. of peptides | % Coverage |
| 1                                                                         | RSSA    | 40S ribosomal protein SA (p40) (34/67 kDa laminin receptor) (Colon carcinoma laminin-binding protein) (NEM/1CHD4) (Multidrug resistance-associated protein MGr1-Ag) - Homo sapiens (Human) | 752   | 32833     | 82              | 45.4       |
| 2                                                                         | RL4     | 60S ribosomal protein L4 (L1) - Homo sapiens (Human)                                                                                                                                       | 651   | 47667     | 128             | 43.8       |
| 3                                                                         | RS16    | 40S ribosomal protein S16 - Homo sapiens (Human)                                                                                                                                           | 626   | 16435     | 105             | 63         |
| 4                                                                         | RS8     | 40S ribosomal protein S8 - Homo sapiens (Human)                                                                                                                                            | 561   | 24190     | 57              | 56.7       |
| 5                                                                         | RS19    | 40S ribosomal protein S19 - Homo sapiens (Human)                                                                                                                                           | 517   | 16051     | 89              | 50.3       |
| 6                                                                         | RS7     | 40S ribosomal protein S7 - Homo sapiens (Human)                                                                                                                                            | 515   | 22113     | 90              | 66         |
| 7                                                                         | RL7     | 60S ribosomal protein L7 - Homo sapiens (Human)                                                                                                                                            | 514   | 29207     | 71              | 56.5       |
| 8                                                                         | RS3     | 40S ribosomal protein S3 - Homo sapiens (Human)                                                                                                                                            | 511   | 26671     | 120             | 77.8       |
| 9                                                                         | RS4X    | 40S ribosomal protein S4, X isoform (Single copy abundant mRNA protein) (SCR10) - Homo sapiens (Human)                                                                                     | 468   | 29579     | 92              | 46         |
| 10                                                                        | RL7A    | 60S ribosomal protein L7a (Surfeit locus protein 3) (PLA-X polypeptide) - Homo sapiens (Human)                                                                                             | 464   | 29977     | 88              | 43.6       |
| 11                                                                        | RS5     | 40S ribosomal protein S5 - Homo sapiens (Human)                                                                                                                                            | 459   | 22862     | 82              | 50         |
| 12                                                                        | ACTB    | Actin, cytoplasmic 1 (Beta-actin) - Homo sapiens (Human)                                                                                                                                   | 444   | 41710     | 91              | 52         |
| 13                                                                        | RL22    | 60S ribosomal protein L22 (Epstein-Barr virus small RNA-associated protein) (EBER-associated protein) (EAP) (Heparin-binding protein HBp15) - Homo sapiens (Human)                         | 435   | 14778     | 57              | 68.8       |
| 14                                                                        | RL5     | 60S ribosomal protein L5 - Homo sapiens (Human)                                                                                                                                            | 423   | 34341     | 80              | 42.1       |

|    |      |                                                                                                                                                                                                                                         |     |        |     |      |
|----|------|-----------------------------------------------------------------------------------------------------------------------------------------------------------------------------------------------------------------------------------------|-----|--------|-----|------|
| 15 | RS21 | 40S ribosomal protein S21 - Homo sapiens (Human)                                                                                                                                                                                        | 421 | 9106   | 25  | 34.9 |
| 16 | ACTA | Actin, aortic smooth muscle (Alpha-actin-2) - Homo sapiens (Human)                                                                                                                                                                      | 398 | 41982  | 68  | 28.6 |
| 17 | RLA0 | 60S acidic ribosomal protein P0 (L10E) - Homo sapiens (Human)                                                                                                                                                                           | 395 | 34252  | 81  | 49.2 |
| 18 | RL10 | 60S ribosomal protein L10 (QM protein) (Tumor suppressor QM) (Laminin receptor homolog) - Homo sapiens (Human)                                                                                                                          | 395 | 24561  | 88  | 61.7 |
| 19 | RL12 | 60S ribosomal protein L12 - Homo sapiens (Human)                                                                                                                                                                                        | 348 | 17808  | 51  | 40.6 |
| 20 | RL15 | 60S ribosomal protein L15 - Homo sapiens (Human)                                                                                                                                                                                        | 347 | 24131  | 54  | 33.8 |
| 21 | RL30 | 60S ribosomal protein L30 - Homo sapiens (Human)                                                                                                                                                                                        | 342 | 12776  | 64  | 72.2 |
| 22 | RL3  | 60S ribosomal protein L3 (HIV-1 TAR RNA-binding protein B) (TARBP-B) - Homo sapiens (Human)                                                                                                                                             | 342 | 46080  | 86  | 42.9 |
| 23 | RL13 | 60S ribosomal protein L13 (Breast basic conserved protein 1) - Homo sapiens (Human)                                                                                                                                                     | 330 | 24247  | 70  | 32.2 |
| 24 | TBB5 | Tubulin beta chain (Tubulin beta-5 chain) - Homo sapiens (Human)                                                                                                                                                                        | 319 | 49639  | 89  | 39.2 |
| 25 | RS18 | 40S ribosomal protein S18 (Ke-3) (Ke3) - Homo sapiens (Human)                                                                                                                                                                           | 317 | 17708  | 67  | 46.1 |
| 26 | RS23 | 40S ribosomal protein S23 - Homo sapiens (Human)                                                                                                                                                                                        | 315 | 15798  | 48  | 51   |
| 27 | MYH9 | Myosin-9 (Myosin heavy chain 9) (Myosin heavy chain, nonmuscle IIa) (Nonmuscle myosin heavy chain IIa) (NMMHC II-a) (NMMHC-IIA) (Cellular myosin heavy chain, type A) (Nonmuscle myosin heavy chain-A) (NMMHC-A) - Homo sapiens (Human) | 293 | 226392 | 108 | 24   |
| 28 | RS2  | 40S ribosomal protein S2 (S4) (LLRep3 protein) - Homo sapiens (Human)                                                                                                                                                                   | 273 | 31305  | 66  | 35.2 |

|    |       |                                                                                                                                                                                                                                          |     |       |    |      |
|----|-------|------------------------------------------------------------------------------------------------------------------------------------------------------------------------------------------------------------------------------------------|-----|-------|----|------|
| 29 | RS3A  | 40S ribosomal protein S3a - Homo sapiens (Human)                                                                                                                                                                                         | 270 | 29926 | 74 | 46.6 |
| 30 | RL6   | 60S ribosomal protein L6 (TAX-responsive enhancer element-binding protein 107) (TAXREB107) (Neoplasm-related protein C140) - Homo sapiens (Human)                                                                                        | 261 | 32708 | 68 | 33   |
| 31 | TBB2A | Tubulin beta-2A chain - Homo sapiens (Human)                                                                                                                                                                                             | 256 | 49875 | 52 | 29.7 |
| 32 | RL11  | 60S ribosomal protein L11 (CLL-associated antigen KW-12) - Homo sapiens (Human)                                                                                                                                                          | 254 | 20240 | 53 | 27.5 |
| 33 | RLA1  | 60S acidic ribosomal protein P1 - Homo sapiens (Human)                                                                                                                                                                                   | 248 | 11507 | 28 | 51.8 |
| 34 | RS13  | 40S ribosomal protein S13 - Homo sapiens (Human)                                                                                                                                                                                         | 245 | 17212 | 73 | 62.3 |
| 35 | TBB2C | Tubulin beta-2C chain (Tubulin beta-2 chain) - Homo sapiens (Human)                                                                                                                                                                      | 234 | 49799 | 53 | 32.4 |
| 36 | RL24  | 60S ribosomal protein L24 (Ribosomal protein L30) - Homo sapiens (Human)                                                                                                                                                                 | 229 | 17768 | 54 | 37.6 |
| 37 | RL18  | 60S ribosomal protein L18 - Homo sapiens (Human)                                                                                                                                                                                         | 229 | 21621 | 48 | 38.8 |
| 38 | RL23  | 60S ribosomal protein L23 (Ribosomal protein L17) - Homo sapiens (Human)                                                                                                                                                                 | 217 | 14856 | 64 | 53.6 |
| 39 | GBLP  | Guanine nucleotide-binding protein subunit beta 2-like 1 (Guanine nucleotide-binding protein subunit beta-like protein 12.3) (Receptor of activated protein kinase C 1) (RACK1) (Receptor for activated C kinase) - Homo sapiens (Human) | 214 | 35055 | 65 | 32.2 |
| 40 | RL27A | 60S ribosomal protein L27a - Homo sapiens (Human)                                                                                                                                                                                        | 207 | 16551 | 45 | 46.6 |
| 41 | RS15A | 40S ribosomal protein S15a - Homo sapiens (Human)                                                                                                                                                                                        | 205 | 14830 | 49 | 61.5 |
| 42 | RL13A | 60S ribosomal protein L13a (23 kDa highly basic protein) - Homo sapiens (Human)                                                                                                                                                          | 201 | 23562 | 51 | 31.5 |

|    |       |                                                                                                                        |     |       |    |      |
|----|-------|------------------------------------------------------------------------------------------------------------------------|-----|-------|----|------|
| 43 | RS14  | 40S ribosomal protein S14 - Homo sapiens (Human)                                                                       | 197 | 16263 | 39 | 41.7 |
| 44 | RL18A | 60S ribosomal protein L18a - Homo sapiens (Human)                                                                      | 197 | 20749 | 62 | 47.2 |
| 45 | TCPG  | T-complex protein 1 subunit gamma (TCP-1-gamma) (CCT-gamma) (hTRiC5) - Homo sapiens (Human)                            | 194 | 60495 | 50 | 30.1 |
| 46 | RL31  | 60S ribosomal protein L31 - Homo sapiens (Human)                                                                       | 192 | 14454 | 29 | 52.8 |
| 47 | ALBU  | Serum albumin precursor - Homo sapiens (Human)                                                                         | 187 | 69321 | 35 | 8.7  |
| 48 | RS25  | 40S ribosomal protein S25 - Homo sapiens (Human)                                                                       | 186 | 13734 | 43 | 32   |
| 49 | TCPB  | T-complex protein 1 subunit beta (TCP-1-beta) (CCT-beta) - Homo sapiens (Human)                                        | 166 | 57452 | 16 | 23   |
| 50 | RL19  | 60S ribosomal protein L19 - Homo sapiens (Human)                                                                       | 163 | 23451 | 30 | 21.9 |
| 51 | RLA2  | 60S acidic ribosomal protein P2 (Renal carcinoma antigen NY-REN-44) - Homo sapiens (Human)                             | 162 | 11658 | 32 | 52.2 |
| 52 | TCPH  | T-complex protein 1 subunit eta (TCP-1-eta) (CCT-eta) (HIV-1 Nef-interacting protein) - Homo sapiens (Human)           | 160 | 59329 | 48 | 28   |
| 53 | RL32  | 60S ribosomal protein L32 - Homo sapiens (Human)                                                                       | 157 | 15850 | 41 | 57.8 |
| 54 | RL8   | 60S ribosomal protein L8 - Homo sapiens (Human)                                                                        | 152 | 28007 | 39 | 37.4 |
| 55 | TCPA  | T-complex protein 1 subunit alpha (TCP-1-alpha) (CCT-alpha) - Homo sapiens (Human)                                     | 135 | 60306 | 22 | 24.3 |
| 56 | TCPQ  | T-complex protein 1 subunit theta (TCP-1-theta) (CCT-theta) (Renal carcinoma antigen NY-REN-15) - Homo sapiens (Human) | 135 | 59583 | 27 | 32.7 |
| 57 | RL36  | 60S ribosomal protein L36 - Homo sapiens (Human)                                                                       | 123 | 12246 | 31 | 37.1 |
| 58 | RS20  | 40S ribosomal protein S20 - Homo sapiens (Human)                                                                       | 106 | 13364 | 44 | 48.7 |

|    |       |                                                                                             |     |        |    |      |
|----|-------|---------------------------------------------------------------------------------------------|-----|--------|----|------|
| 59 | RL14  | 60S ribosomal protein L14 (CAG-ISL 7) - Homo sapiens (Human)                                | 100 | 23275  | 47 | 34.3 |
| 60 | RL10A | 60S ribosomal protein L10a (CSA-19) - Homo sapiens (Human)                                  | 99  | 24816  | 33 | 35.5 |
| 61 | RL35  | 60S ribosomal protein L35 - Homo sapiens (Human)                                            | 98  | 14543  | 16 | 29.3 |
| 62 | MYO1C | Myosin-1c (Myosin I beta) (MMI-beta) (MMIb) - Homo sapiens (Human)                          | 95  | 117965 | 21 | 11.7 |
| 63 | RS11  | 40S ribosomal protein S11 - Homo sapiens (Human)                                            | 94  | 18419  | 55 | 50   |
| 64 | TCPE  | T-complex protein 1 subunit epsilon (TCP-1-epsilon) (CCT-epsilon) - Homo sapiens (Human)    | 93  | 59633  | 33 | 24.8 |
| 65 | RS26  | 40S ribosomal protein S26 - Homo sapiens (Human)                                            | 87  | 13007  | 28 | 33.9 |
| 66 | RS24  | 40S ribosomal protein S24 - Homo sapiens (Human)                                            | 86  | 15413  | 27 | 36.1 |
| 67 | RS17  | 40S ribosomal protein S17 - Homo sapiens (Human)                                            | 85  | 15540  | 50 | 63   |
| 68 | RL29  | 60S ribosomal protein L29 (Cell surface heparin-binding protein HIP) - Homo sapiens (Human) | 79  | 17741  | 13 | 21.4 |
| 69 | RS27L | 40S ribosomal protein S27-like protein - Homo sapiens (Human)                               | 75  | 9471   | 22 | 27.4 |
| 70 | RL17  | 60S ribosomal protein L17 (L23) - Homo sapiens (Human)                                      | 75  | 21383  | 50 | 44   |
| 71 | RL26  | 60S ribosomal protein L26 - Homo sapiens (Human)                                            | 73  | 17248  | 34 | 40.7 |
| 72 | RL28  | 60S ribosomal protein L28 - Homo sapiens (Human)                                            | 72  | 15738  | 23 | 37.2 |
| 73 | RS29  | 40S ribosomal protein S29 - Homo sapiens (Human)                                            | 71  | 6672   | 22 | 46.4 |
| 74 | RL27  | 60S ribosomal protein L27 - Homo sapiens (Human)                                            | 71  | 15788  | 14 | 47.8 |
| 75 | RL9   | 60S ribosomal protein L9 - Homo sapiens (Human)                                             | 69  | 21850  | 45 | 43.2 |
| 76 | MLRM  | Myosin regulatory light chain 2, nonsarcomeric (Myosin RLC) - Homo sapiens (Human)          | 62  | 19781  | 6  | 5.8  |

|    |       |                                                                                                                                                                                 |    |       |    |      |
|----|-------|---------------------------------------------------------------------------------------------------------------------------------------------------------------------------------|----|-------|----|------|
| 77 | HSP7C | Heat shock cognate 71 kDa protein (Heat shock 70 kDa protein 8) - Homo sapiens (Human)                                                                                          | 60 | 70854 | 18 | 11.8 |
| 78 | RL23A | 60S ribosomal protein L23a - Homo sapiens (Human)                                                                                                                               | 59 | 17684 | 33 | 32.7 |
| 79 | RL21  | 60S ribosomal protein L21 - Homo sapiens (Human)                                                                                                                                | 57 | 18553 | 39 | 35.6 |
| 80 | RS6   | 40S ribosomal protein S6 (Phosphoprotein NP33) - Homo sapiens (Human)                                                                                                           | 56 | 28663 | 26 | 34.1 |
| 81 | UBIQ  | Ubiquitin - Homo sapiens (Human)                                                                                                                                                | 51 | 8560  | 16 | 39.5 |
| 82 | RS12  | 40S ribosomal protein S12 - Homo sapiens (Human)                                                                                                                                | 50 | 14516 | 13 | 17.4 |
| 83 | RS9   | 40S ribosomal protein S9 - Homo sapiens (Human)                                                                                                                                 | 50 | 22578 | 37 | 36.1 |
| 84 | RL40  | 60S ribosomal protein L40 (CEP52) - Homo sapiens (Human)                                                                                                                        | 50 | 6177  | 8  | 13.5 |
| 85 | RS30  | 40S ribosomal protein S30 - Homo sapiens (Human)                                                                                                                                | 47 | 6644  | 14 | 18.6 |
| 86 | RS10  | 40S ribosomal protein S10 - Homo sapiens (Human)                                                                                                                                | 45 | 18886 | 7  | 10.9 |
| 87 | MYL6  | Myosin light polypeptide 6 (Smooth muscle and nonmuscle myosin light chain alkali 6) (Myosin light chain alkali 3) (Myosin light chain 3) (MLC-3) (LC17) - Homo sapiens (Human) | 45 | 16919 | 25 | 35.1 |
| 88 | RL38  | 60S ribosomal protein L38 - Homo sapiens (Human)                                                                                                                                | 41 | 8213  | 13 | 34.3 |
| 89 | TCPZ  | T-complex protein 1 subunit zeta (TCP-1-zeta) (CCT-zeta) (CCT-zeta-1) (Tcp20) (HTR3) (Acute morphine dependence-related protein 2) - Homo sapiens (Human)                       | 41 | 57988 | 33 | 30.9 |
| 90 | TBAK  | Tubulin alpha-ubiquitous chain (Alpha-tubulin ubiquitous) (Tubulin K-alpha-1) - Homo sapiens (Human)                                                                            | 37 | 50120 | 35 | 20.4 |
| 91 | RL34  | 60S ribosomal protein L34 - Homo sapiens (Human)                                                                                                                                | 36 | 13284 | 28 | 21.4 |

|     |       |                                                                                                                                                                                                           |    |        |    |      |
|-----|-------|-----------------------------------------------------------------------------------------------------------------------------------------------------------------------------------------------------------|----|--------|----|------|
| 92  | DYHC  | Dynein heavy chain, cytosolic (DYHC) (Cytoplasmic dynein heavy chain 1) (DHC1) (Dynein heavy chain 1, cytoplasmic 1) - Homo sapiens (Human)                                                               | 36 | 532072 | 7  | 0.9  |
| 93  | SYEP  | Bifunctional aminoacyl-tRNA synthetase [Includes: Glutamyl-tRNA synthetase (EC 6.1.1.17) (Glutamate--tRNA ligase); Prolyl-tRNA synthetase (EC 6.1.1.15) (Proline--tRNA ligase)] - Homo sapiens (Human)    | 34 | 162923 | 6  | 6.3  |
| 94  | RL35A | 60S ribosomal protein L35a - Homo sapiens (Human)                                                                                                                                                         | 33 | 12530  | 22 | 21.8 |
| 95  | MVP   | Major vault protein (MVP) (Lung resistance-related protein) - Homo sapiens (Human)                                                                                                                        | 33 | 99266  | 25 | 24.1 |
| 96  | SMN   | Survival motor neuron protein (Component of gems 1) (Gemin-1) - Homo sapiens (Human)                                                                                                                      | 33 | 31828  | 2  | 6.1  |
| 97  | TCPD  | T-complex protein 1 subunit delta (TCP-1-delta) (CCT-delta) (Stimulator of TAR RNA-binding) - Homo sapiens (Human)                                                                                        | 32 | 57888  | 36 | 46.4 |
| 98  | PSB1  | Proteasome subunit beta type 1 precursor (EC 3.4.25.1) (Proteasome component C5) (Macropain subunit C5) (Multicatalytic endopeptidase complex subunit C5) (Proteasome gamma chain) - Homo sapiens (Human) | 30 | 26472  | 6  | 7.5  |
| 99  | TPP2  | Tripeptidyl-peptidase 2 (EC 3.4.14.10) (Tripeptidyl-peptidase II) (TPP-II) (Tripeptidyl aminopeptidase) - Homo sapiens (Human)                                                                            | 29 | 138263 | 1  | 1    |
| 100 | ATPB  | ATP synthase subunit beta, mitochondrial precursor (EC 3.6.3.14) - Homo sapiens (Human)                                                                                                                   | 28 | 56525  | 9  | 12.5 |

|     |       |                                                                                                                                                                                                |    |        |    |      |
|-----|-------|------------------------------------------------------------------------------------------------------------------------------------------------------------------------------------------------|----|--------|----|------|
| 101 | PSA4  | Proteasome subunit alpha type 4 (EC 3.4.25.1) (Proteasome component C9) (Macropain subunit C9) (Multicatalytic endopeptidase complex subunit C9) (Proteasome subunit L) - Homo sapiens (Human) | 27 | 29465  | 2  | 6.5  |
| 102 | IGHG1 | Ig gamma-1 chain C region - Homo sapiens (Human)                                                                                                                                               | 27 | 36083  | 8  | 3.6  |
| 103 | RS28  | 40S ribosomal protein S28 - Homo sapiens (Human)                                                                                                                                               | 27 | 7836   | 6  | 40.6 |
| 104 | RS15  | 40S ribosomal protein S15 (RIG protein) - Homo sapiens (Human)                                                                                                                                 | 25 | 17029  | 25 | 42.8 |
| 105 | CLH1  | Clathrin heavy chain 1 (CLH-17) - Homo sapiens (Human)                                                                                                                                         | 23 | 191493 | 1  | 1.1  |
| 106 | PYR1  | CAD protein [Includes: Glutamine-dependent carbamoyl-phosphate synthase (EC 6.3.5.5); Aspartate carbamoyltransferase (EC 2.1.3.2); Dihydroorotase (EC 3.5.2.3)] - Homo sapiens (Human)         | 23 | 242829 | 1  | 0.5  |
| 107 | EF1A1 | Elongation factor 1-alpha 1 (EF-1-alpha-1) (Elongation factor 1 A-1) (eEF1A-1) (Elongation factor Tu) (EF-Tu) (Leukocyte receptor cluster member 7) - Homo sapiens (Human)                     | 23 | 50109  | 5  | 8    |
| 108 | BAG2  | BAG family molecular chaperone regulator 2 (BCL2-associated athanogene 2) (BAG-2) - Homo sapiens (Human)                                                                                       | 23 | 23757  | 5  | 13.3 |
| 109 | RL39  | 60S ribosomal protein L39 - Homo sapiens (Human)                                                                                                                                               | 23 | 6403   | 9  | 23.5 |



|     |       |                                                                                                                                                                                                                                                          |    |       |    |     |
|-----|-------|----------------------------------------------------------------------------------------------------------------------------------------------------------------------------------------------------------------------------------------------------------|----|-------|----|-----|
| 110 | TCPW  | T-complex protein 1 subunit zeta-2 (TCP-1-zeta-2) (CCT-zeta-2) (TCP-1-zeta-like) (CCT-zeta-like) (Testis-specific Tcp20) (Testis-specific protein TSA303) - Homo sapiens (Human)                                                                         | 22 | 57729 | 10 | 6.2 |
| 111 | SYDC  | Aspartyl-tRNA synthetase, cytoplasmic (EC 6.1.1.12) (Aspartate--tRNA ligase) (AspRS) (Cell proliferation-inducing gene 40 protein) - Homo sapiens (Human)                                                                                                | 22 | 57100 | 6  | 8.2 |
| 112 | MCE1  | mRNA capping enzyme (HCE) (HCAP1) [Includes: Polynucleotide 5--triphosphatase (EC 3.1.3.33) (mRNA 5--triphosphatase) (TPase); mRNA guanylyltransferase (EC 2.7.7.50) (GTP--RNA guanylyltransferase) (GTase)] - Homo sapiens (Human)                      | 21 | 68513 | 9  | 2.3 |
| 113 | PSMD6 | 26S proteasome non-ATPase regulatory subunit 6 (26S proteasome regulatory subunit S10) (p42A) (Proteasome regulatory particle subunit p44S10) (Phosphonoformate immun-associated protein 4) (Breast cancer-associated protein SGA-113M) - Homo sapiens ( | 21 | 45502 | 2  | 4.4 |
| 114 | CH60  | 60 kDa heat shock protein, mitochondrial precursor (Hsp60) (60 kDa chaperonin) (CPN60) (Heat shock protein 60) (HSP-60) (Mitochondrial matrix protein P1) (P60 lymphocyte protein) (HuCHA60) - Homo sapiens (Human)                                      | 20 | 61016 | 11 | 4.9 |

|     |       |                                                                                                                                                                                                                                                           |    |        |   |     |
|-----|-------|-----------------------------------------------------------------------------------------------------------------------------------------------------------------------------------------------------------------------------------------------------------|----|--------|---|-----|
| 115 | PRS10 | 26S protease regulatory subunit S10B (Proteasome 26S subunit ATPase 6) (Proteasome subunit p42) - Homo sapiens (Human)                                                                                                                                    | 20 | 44145  | 1 | 3.1 |
| 116 | PYGM  | Glycogen phosphorylase, muscle form (EC 2.4.1.1) (Myophosphorylase) - Homo sapiens (Human)                                                                                                                                                                | 20 | 97031  | 2 | 2   |
| 117 | MCA1  | Multisynthetase complex auxiliary component p43 [Contains: Endothelial monocyte-activating polypeptide 2 (EMAP-II) (Small inducible cytokine subfamily E member 1)] - Homo sapiens (Human)                                                                | 20 | 34331  | 7 | 9.6 |
| 118 | PSMD2 | 26S proteasome non-ATPase regulatory subunit 2 (26S proteasome regulatory subunit RPN1) (26S proteasome regulatory subunit S2) (26S proteasome subunit p97) (Tumor necrosis factor type 1 receptor-associated protein 2) (55.11 protein) - Homo sapiens ( | 19 | 100136 | 1 | 1.7 |
| 119 | RUXE  | Small nuclear ribonucleoprotein E (snRNP-E) (Sm protein E) (Sm-E) (SmE) - Homo sapiens (Human)                                                                                                                                                            | 19 | 10797  | 5 | 12  |
| 120 | RL36A | 60S ribosomal protein L36a (60S ribosomal protein L44) (Migration-inducing gene 6 protein) - Homo sapiens (Human)                                                                                                                                         | 19 | 12433  | 6 | 6.6 |

| <b>Table S1B</b>                                                                |         |                                                                                                                                                                                                                                         |       |           |                 |            |
|---------------------------------------------------------------------------------|---------|-----------------------------------------------------------------------------------------------------------------------------------------------------------------------------------------------------------------------------------------|-------|-----------|-----------------|------------|
| <b>Peptides discovered by mass spectrometry of monosome pellet   Silvestrol</b> |         |                                                                                                                                                                                                                                         |       |           |                 |            |
| Rank                                                                            | Protein | Description                                                                                                                                                                                                                             | Score | Mass (Da) | No. of peptides | % Coverage |
| 1                                                                               | RSSA    | 40S ribosomal protein SA (p40) (34/67 kDa laminin receptor) (Colon carcinoma laminin-binding protein) (NEM/1CHD4) (Multidrug resistance-associated protein MGr1-Ag) - Homo sapiens (Human)                                              | 969   | 32833     | 102             | 51.9       |
| 2                                                                               | MYH9    | Myosin-9 (Myosin heavy chain 9) (Myosin heavy chain, nonmuscle IIa) (Nonmuscle myosin heavy chain IIa) (NMMHC II-a) (NMMHC-IIA) (Cellular myosin heavy chain, type A) (Nonmuscle myosin heavy chain-A) (NMMHC-A) - Homo sapiens (Human) | 918   | 226392    | 216             | 31.1       |
| 3                                                                               | RL7     | 60S ribosomal protein L7 - Homo sapiens (Human)                                                                                                                                                                                         | 786   | 29207     | 127             | 64.5       |
| 4                                                                               | RS16    | 40S ribosomal protein S16 - Homo sapiens (Human)                                                                                                                                                                                        | 771   | 16435     | 116             | 66.4       |
| 5                                                                               | RS3     | 40S ribosomal protein S3 - Homo sapiens (Human)                                                                                                                                                                                         | 701   | 26671     | 153             | 77.8       |
| 6                                                                               | RLA0    | 60S acidic ribosomal protein P0 (L10E) - Homo sapiens (Human)                                                                                                                                                                           | 674   | 34252     | 117             | 51.1       |
| 7                                                                               | RL4     | 60S ribosomal protein L4 (L1) - Homo sapiens (Human)                                                                                                                                                                                    | 659   | 47667     | 149             | 48.5       |
| 8                                                                               | RS5     | 40S ribosomal protein S5 - Homo sapiens (Human)                                                                                                                                                                                         | 640   | 22862     | 104             | 50         |
| 9                                                                               | RL12    | 60S ribosomal protein L12 - Homo sapiens (Human)                                                                                                                                                                                        | 597   | 17808     | 73              | 40.6       |
| 10                                                                              | RS4X    | 40S ribosomal protein S4, X isoform (Single copy abundant mRNA protein) (SCR10) - Homo sapiens (Human)                                                                                                                                  | 576   | 29579     | 107             | 43.7       |
| 11                                                                              | RS7     | 40S ribosomal protein S7 - Homo sapiens (Human)                                                                                                                                                                                         | 551   | 22113     | 95              | 61.9       |
| 12                                                                              | RS19    | 40S ribosomal protein S19 - Homo sapiens (Human)                                                                                                                                                                                        | 533   | 16051     | 96              | 60.7       |

|    |      |                                                                                                                                                                    |     |       |     |      |
|----|------|--------------------------------------------------------------------------------------------------------------------------------------------------------------------|-----|-------|-----|------|
| 13 | RL3  | 60S ribosomal protein L3 (HIV-1 TAR RNA-binding protein B) (TARBP-B) - Homo sapiens (Human)                                                                        | 523 | 46080 | 106 | 44.9 |
| 14 | RL22 | 60S ribosomal protein L22 (Epstein-Barr virus small RNA-associated protein) (EBER-associated protein) (EAP) (Heparin-binding protein HBp15) - Homo sapiens (Human) | 517 | 14778 | 73  | 71.9 |
| 15 | ACTB | Actin, cytoplasmic 1 (Beta-actin) - Homo sapiens (Human)                                                                                                           | 496 | 41710 | 118 | 63.5 |
| 16 | RS8  | 40S ribosomal protein S8 - Homo sapiens (Human)                                                                                                                    | 494 | 24190 | 75  | 57.2 |
| 17 | RL30 | 60S ribosomal protein L30 - Homo sapiens (Human)                                                                                                                   | 475 | 12776 | 86  | 72.2 |
| 18 | RS2  | 40S ribosomal protein S2 (S4) (LLRep3 protein) - Homo sapiens (Human)                                                                                              | 463 | 31305 | 104 | 41.6 |
| 19 | TBB5 | Tubulin beta chain (Tubulin beta-5 chain) - Homo sapiens (Human)                                                                                                   | 462 | 49639 | 83  | 39.9 |
| 20 | RL7A | 60S ribosomal protein L7a (Surfeit locus protein 3) (PLA-X polypeptide) - Homo sapiens (Human)                                                                     | 449 | 29977 | 88  | 44.4 |
| 21 | RL24 | 60S ribosomal protein L24 (Ribosomal protein L30) - Homo sapiens (Human)                                                                                           | 444 | 17768 | 60  | 37.6 |
| 22 | RL10 | 60S ribosomal protein L10 (QM protein) (Tumor suppressor QM) (Laminin receptor homolog) - Homo sapiens (Human)                                                     | 441 | 24561 | 99  | 64.5 |
| 23 | RL5  | 60S ribosomal protein L5 - Homo sapiens (Human)                                                                                                                    | 437 | 34341 | 98  | 45.5 |
| 24 | RL23 | 60S ribosomal protein L23 (Ribosomal protein L17) - Homo sapiens (Human)                                                                                           | 435 | 14856 | 75  | 53.6 |
| 25 | RS21 | 40S ribosomal protein S21 - Homo sapiens (Human)                                                                                                                   | 418 | 9106  | 33  | 60.2 |
| 26 | RS18 | 40S ribosomal protein S18 (Ke-3) (Ke3) - Homo sapiens (Human)                                                                                                      | 382 | 17708 | 78  | 45.4 |
| 27 | RS17 | 40S ribosomal protein S17 - Homo sapiens (Human)                                                                                                                   | 367 | 15540 | 71  | 69.6 |

|    |       |                                                                                                                                                                                                                                          |     |       |    |      |
|----|-------|------------------------------------------------------------------------------------------------------------------------------------------------------------------------------------------------------------------------------------------|-----|-------|----|------|
| 28 | RL13  | 60S ribosomal protein L13 (Breast basic conserved protein 1) - Homo sapiens (Human)                                                                                                                                                      | 361 | 24247 | 81 | 39.3 |
| 29 | RS13  | 40S ribosomal protein S13 - Homo sapiens (Human)                                                                                                                                                                                         | 357 | 17212 | 90 | 58.3 |
| 30 | GBLP  | Guanine nucleotide-binding protein subunit beta 2-like 1 (Guanine nucleotide-binding protein subunit beta-like protein 12.3) (Receptor of activated protein kinase C 1) (RACK1) (Receptor for activated C kinase) - Homo sapiens (Human) | 353 | 35055 | 86 | 48.6 |
| 31 | ACTA  | Actin, aortic smooth muscle (Alpha-actin-2) - Homo sapiens (Human)                                                                                                                                                                       | 351 | 41982 | 77 | 31.3 |
| 32 | RL11  | 60S ribosomal protein L11 (CLL-associated antigen KW-12) - Homo sapiens (Human)                                                                                                                                                          | 331 | 20240 | 54 | 27.5 |
| 33 | RL27A | 60S ribosomal protein L27a - Homo sapiens (Human)                                                                                                                                                                                        | 326 | 16551 | 53 | 46.6 |
| 34 | RL18  | 60S ribosomal protein L18 - Homo sapiens (Human)                                                                                                                                                                                         | 320 | 21621 | 60 | 41   |
| 35 | TBB3  | Tubulin beta-3 chain (Tubulin beta-III) (Tubulin beta-4) - Homo sapiens (Human)                                                                                                                                                          | 298 | 50400 | 33 | 20.4 |
| 36 | TBB2C | Tubulin beta-2C chain (Tubulin beta-2 chain) - Homo sapiens (Human)                                                                                                                                                                      | 290 | 49799 | 48 | 35.7 |
| 37 | RL6   | 60S ribosomal protein L6 (TAX-responsive enhancer element-binding protein 107) (TAXREB107) (Neoplasm-related protein C140) - Homo sapiens (Human)                                                                                        | 285 | 32708 | 81 | 33   |
| 38 | EF2   | Elongation factor 2 (EF-2) - Homo sapiens (Human)                                                                                                                                                                                        | 283 | 95277 | 72 | 32.5 |
| 39 | RS20  | 40S ribosomal protein S20 - Homo sapiens (Human)                                                                                                                                                                                         | 277 | 13364 | 41 | 63   |
| 40 | RS23  | 40S ribosomal protein S23 - Homo sapiens (Human)                                                                                                                                                                                         | 270 | 15798 | 56 | 54.5 |
| 41 | RL15  | 60S ribosomal protein L15 - Homo sapiens (Human)                                                                                                                                                                                         | 267 | 24131 | 70 | 39.7 |

|    |       |                                                                                                              |     |       |    |      |
|----|-------|--------------------------------------------------------------------------------------------------------------|-----|-------|----|------|
| 42 | RLA2  | 60S acidic ribosomal protein P2 (Renal carcinoma antigen NY-REN-44) - Homo sapiens (Human)                   | 255 | 11658 | 38 | 52.2 |
| 43 | RS3A  | 40S ribosomal protein S3a - Homo sapiens (Human)                                                             | 251 | 29926 | 74 | 54.2 |
| 44 | RLA1  | 60S acidic ribosomal protein P1 - Homo sapiens (Human)                                                       | 244 | 11507 | 33 | 51.8 |
| 45 | RS14  | 40S ribosomal protein S14 - Homo sapiens (Human)                                                             | 240 | 16263 | 43 | 41.1 |
| 46 | RL19  | 60S ribosomal protein L19 - Homo sapiens (Human)                                                             | 233 | 23451 | 30 | 21.9 |
| 47 | RL14  | 60S ribosomal protein L14 (CAG-ISL 7) - Homo sapiens (Human)                                                 | 215 | 23275 | 55 | 39.9 |
| 48 | RS15A | 40S ribosomal protein S15a - Homo sapiens (Human)                                                            | 209 | 14830 | 59 | 61.5 |
| 49 | TCPH  | T-complex protein 1 subunit eta (TCP-1-eta) (CCT-eta) (HIV-1 Nef-interacting protein) - Homo sapiens (Human) | 208 | 59329 | 65 | 34.1 |
| 50 | RL18A | 60S ribosomal protein L18a - Homo sapiens (Human)                                                            | 204 | 20749 | 86 | 58   |
| 51 | RS25  | 40S ribosomal protein S25 - Homo sapiens (Human)                                                             | 202 | 13734 | 50 | 32   |
| 52 | RS24  | 40S ribosomal protein S24 - Homo sapiens (Human)                                                             | 188 | 15413 | 34 | 40.6 |
| 53 | RS11  | 40S ribosomal protein S11 - Homo sapiens (Human)                                                             | 183 | 18419 | 73 | 63.3 |
| 54 | RS15  | 40S ribosomal protein S15 (RIG protein) - Homo sapiens (Human)                                               | 173 | 17029 | 48 | 45.5 |
| 55 | RL32  | 60S ribosomal protein L32 - Homo sapiens (Human)                                                             | 160 | 15850 | 44 | 57.8 |
| 56 | RL34  | 60S ribosomal protein L34 - Homo sapiens (Human)                                                             | 159 | 13284 | 77 | 26.5 |
| 57 | RL9   | 60S ribosomal protein L9 - Homo sapiens (Human)                                                              | 158 | 21850 | 61 | 52.6 |
| 58 | RL29  | 60S ribosomal protein L29 (Cell surface heparin-binding protein HIP) - Homo sapiens (Human)                  | 153 | 17741 | 17 | 16.4 |
| 59 | RL27  | 60S ribosomal protein L27 - Homo sapiens (Human)                                                             | 146 | 15788 | 21 | 28.7 |

|    |       |                                                                                             |     |       |    |      |
|----|-------|---------------------------------------------------------------------------------------------|-----|-------|----|------|
| 60 | TCPE  | T-complex protein 1 subunit epsilon (TCP-1-epsilon) (CCT-epsilon) - Homo sapiens (Human)    | 146 | 59633 | 34 | 30.7 |
| 61 | RL31  | 60S ribosomal protein L31 - Homo sapiens (Human)                                            | 143 | 14454 | 37 | 52   |
| 62 | MVP   | Major vault protein (MVP) (Lung resistance-related protein) - Homo sapiens (Human)          | 143 | 99266 | 57 | 32.1 |
| 63 | RS10  | 40S ribosomal protein S10 - Homo sapiens (Human)                                            | 139 | 18886 | 24 | 24.2 |
| 64 | RL8   | 60S ribosomal protein L8 - Homo sapiens (Human)                                             | 138 | 28007 | 41 | 40.1 |
| 65 | RS26  | 40S ribosomal protein S26 - Homo sapiens (Human)                                            | 134 | 13007 | 40 | 58.3 |
| 66 | RL36  | 60S ribosomal protein L36 - Homo sapiens (Human)                                            | 134 | 12246 | 37 | 37.1 |
| 67 | RL13A | 60S ribosomal protein L13a (23 kDa highly basic protein) - Homo sapiens (Human)             | 123 | 23562 | 66 | 43.3 |
| 68 | RL23A | 60S ribosomal protein L23a - Homo sapiens (Human)                                           | 122 | 17684 | 56 | 33.3 |
| 69 | RS27L | 40S ribosomal protein S27-like protein - Homo sapiens (Human)                               | 116 | 9471  | 25 | 27.4 |
| 70 | TCPG  | T-complex protein 1 subunit gamma (TCP-1-gamma) (CCT-gamma) (hTRiC5) - Homo sapiens (Human) | 115 | 60495 | 44 | 32.7 |
| 71 | RS12  | 40S ribosomal protein S12 - Homo sapiens (Human)                                            | 115 | 14516 | 17 | 20.5 |
| 72 | TCPB  | T-complex protein 1 subunit beta (TCP-1-beta) (CCT-beta) - Homo sapiens (Human)             | 109 | 57452 | 15 | 24.3 |
| 73 | RL21  | 60S ribosomal protein L21 - Homo sapiens (Human)                                            | 102 | 18553 | 44 | 41.2 |
| 74 | RL35  | 60S ribosomal protein L35 - Homo sapiens (Human)                                            | 95  | 14543 | 22 | 29.3 |
| 75 | RL28  | 60S ribosomal protein L28 - Homo sapiens (Human)                                            | 92  | 15738 | 28 | 35   |
| 76 | RL26  | 60S ribosomal protein L26 - Homo sapiens (Human)                                            | 92  | 17248 | 45 | 37.2 |

|    |       |                                                                                                                                                                                                                     |    |       |    |      |
|----|-------|---------------------------------------------------------------------------------------------------------------------------------------------------------------------------------------------------------------------|----|-------|----|------|
| 77 | MYL6  | Myosin light polypeptide 6 (Smooth muscle and nonmuscle myosin light chain alkali 6) (Myosin light chain alkali 3) (Myosin light chain 3) (MLC-3) (LC17) - Homo sapiens (Human)                                     | 91 | 16919 | 30 | 41.1 |
| 78 | RS9   | 40S ribosomal protein S9 - Homo sapiens (Human)                                                                                                                                                                     | 90 | 22578 | 48 | 38.1 |
| 79 | RS6   | 40S ribosomal protein S6 (Phosphoprotein NP33) - Homo sapiens (Human)                                                                                                                                               | 88 | 28663 | 34 | 34.1 |
| 80 | RL17  | 60S ribosomal protein L17 (L23) - Homo sapiens (Human)                                                                                                                                                              | 85 | 21383 | 59 | 43.5 |
| 81 | MLRM  | Myosin regulatory light chain 2, nonsarcomeric (Myosin RLC) - Homo sapiens (Human)                                                                                                                                  | 85 | 19781 | 7  | 5.8  |
| 82 | TBAK  | Tubulin alpha-ubiquitous chain (Alpha-tubulin ubiquitous) (Tubulin K-alpha-1) - Homo sapiens (Human)                                                                                                                | 84 | 50120 | 41 | 30.4 |
| 83 | CH60  | 60 kDa heat shock protein, mitochondrial precursor (Hsp60) (60 kDa chaperonin) (CPN60) (Heat shock protein 60) (HSP-60) (Mitochondrial matrix protein P1) (P60 lymphocyte protein) (HuCHA60) - Homo sapiens (Human) | 83 | 61016 | 14 | 4.9  |
| 84 | RL10A | 60S ribosomal protein L10a (CSA-19) - Homo sapiens (Human)                                                                                                                                                          | 75 | 24816 | 45 | 44.7 |
| 85 | UBIQ  | Ubiquitin - Homo sapiens (Human)                                                                                                                                                                                    | 73 | 8560  | 13 | 31.6 |
| 86 | RS30  | 40S ribosomal protein S30 - Homo sapiens (Human)                                                                                                                                                                    | 73 | 6644  | 13 | 18.6 |
| 87 | SMD1  | Small nuclear ribonucleoprotein Sm D1 (snRNP core protein D1) (Sm-D1) (Sm-D autoantigen) - Homo sapiens (Human)                                                                                                     | 67 | 13273 | 12 | 18.5 |
| 88 | RL35A | 60S ribosomal protein L35a - Homo sapiens (Human)                                                                                                                                                                   | 63 | 12530 | 24 | 21.8 |



|    |       |                                                                                                                                       |    |        |    |      |
|----|-------|---------------------------------------------------------------------------------------------------------------------------------------|----|--------|----|------|
| 89 | TCPD  | T-complex protein 1 subunit delta (TCP-1-delta) (CCT-delta) (Stimulator of TAR RNA-binding) - Homo sapiens (Human)                    | 62 | 57888  | 31 | 36.7 |
| 90 | RS29  | 40S ribosomal protein S29 - Homo sapiens (Human)                                                                                      | 57 | 6672   | 27 | 46.4 |
| 91 | MYO1C | Myosin-Ic (Myosin I beta) (MMI-beta) (MMIb) - Homo sapiens (Human)                                                                    | 56 | 117965 | 24 | 13.7 |
| 92 | TCPA  | T-complex protein 1 subunit alpha (TCP-1-alpha) (CCT-alpha) - Homo sapiens (Human)                                                    | 56 | 60306  | 20 | 25.9 |
| 93 | ATPB  | ATP synthase subunit beta, mitochondrial precursor (EC 3.6.3.14) - Homo sapiens (Human)                                               | 55 | 56525  | 18 | 29.9 |
| 94 | TCPQ  | T-complex protein 1 subunit theta (TCP-1-theta) (CCT-theta) (Renal carcinoma antigen NY-REN-15) - Homo sapiens (Human)                | 54 | 59583  | 21 | 24.5 |
| 95 | HSP7C | Heat shock cognate 71 kDa protein (Heat shock 70 kDa protein 8) - Homo sapiens (Human)                                                | 49 | 70854  | 20 | 13.8 |
| 96 | RL38  | 60S ribosomal protein L38 - Homo sapiens (Human)                                                                                      | 34 | 8213   | 25 | 34.3 |
| 97 | RL40  | 60S ribosomal protein L40 (CEP52) - Homo sapiens (Human)                                                                              | 34 | 6177   | 8  | 13.5 |
| 98 | LYAR  | Cell growth-regulating nucleolar protein - Homo sapiens (Human)                                                                       | 33 | 43588  | 4  | 7.9  |
| 99 | IF6   | Eukaryotic translation initiation factor 6 (eIF-6) (B4 integrin interactor) (CAB) (p27(BBP)) (B(2)GCN homolog) - Homo sapiens (Human) | 30 | 26582  | 10 | 24.1 |

|     |       |                                                                                                                                                                                                           |    |       |    |      |
|-----|-------|-----------------------------------------------------------------------------------------------------------------------------------------------------------------------------------------------------------|----|-------|----|------|
| 100 | PSB1  | Proteasome subunit beta type 1 precursor (EC 3.4.25.1) (Proteasome component C5) (Macropain subunit C5) (Multicatalytic endopeptidase complex subunit C5) (Proteasome gamma chain) - Homo sapiens (Human) | 30 | 26472 | 3  | 7.5  |
| 101 | TCPZ  | T-complex protein 1 subunit zeta (TCP-1-zeta) (CCT-zeta) (CCT-zeta-1) (Tcp20) (HTR3) (Acute morphine dependence-related protein 2) - Homo sapiens (Human)                                                 | 29 | 57988 | 13 | 19.6 |
| 102 | IGHG1 | Ig gamma-1 chain C region - Homo sapiens (Human)                                                                                                                                                          | 29 | 36083 | 7  | 2.4  |
| 103 | PRS6A | 26S protease regulatory subunit 6A (Proteasome 26S subunit ATPase 3) (Tat-binding protein 1) (TBP-1) (Proteasome subunit P50) - Homo sapiens (Human)                                                      | 28 | 49172 | 2  | 8.2  |
| 104 | RL37A | 60S ribosomal protein L37a - Homo sapiens (Human)                                                                                                                                                         | 26 | 10268 | 17 | 54.3 |
| 105 | SMD3  | Small nuclear ribonucleoprotein Sm D3 (snRNP core protein D3) (Sm-D3) - Homo sapiens (Human)                                                                                                              | 24 | 13907 | 2  | 8.7  |
| 106 | ALBU  | Serum albumin precursor - Homo sapiens (Human)                                                                                                                                                            | 24 | 69321 | 6  | 7.6  |
| 107 | H13   | Histone H1.3 (Histone H1c) - Homo sapiens (Human)                                                                                                                                                         | 24 | 22336 | 7  | 14.5 |
| 108 | PSA4  | Proteasome subunit alpha type 4 (EC 3.4.25.1) (Proteasome component C9) (Macropain subunit C9) (Multicatalytic endopeptidase complex subunit C9) (Proteasome subunit L) - Homo sapiens (Human)            | 23 | 29465 | 1  | 3.4  |

|     |       |                                                                                                                                                                            |    |         |    |      |
|-----|-------|----------------------------------------------------------------------------------------------------------------------------------------------------------------------------|----|---------|----|------|
| 109 | EF1A1 | Elongation factor 1-alpha 1 (EF-1-alpha-1) (Elongation factor 1 A-1) (eEF1A-1) (Elongation factor Tu) (EF-Tu) (Leukocyte receptor cluster member 7) - Homo sapiens (Human) | 23 | 50109   | 8  | 21.4 |
| 110 | RS28  | 40S ribosomal protein S28 - Homo sapiens (Human)                                                                                                                           | 22 | 7836    | 7  | 29   |
| 111 | RL39  | 60S ribosomal protein L39 - Homo sapiens (Human)                                                                                                                           | 22 | 6403    | 7  | 23.5 |
| 112 | PICK1 | PRKCA-binding protein (Protein kinase C-alpha-binding protein) (Protein interacting with C kinase 1) - Homo sapiens (Human)                                                | 20 | 46571   | 9  | 4.6  |
| 113 | SYLC  | Leucyl-tRNA synthetase, cytoplasmic (EC 6.1.1.4) (Leucine--tRNA ligase) (LeuRS) - Homo sapiens (Human)                                                                     | 19 | 134379  | 5  | 4    |
| 114 | PRS6B | 26S protease regulatory subunit 6B (Proteasome 26S subunit ATPase 4) (MIP224) (MB67-interacting protein) (TAT-binding protein 7) (TBP-7) - Homo sapiens (Human)            | 18 | 47337   | 5  | 12.2 |
| 115 | PRAM7 | PRAME family member 7 - Homo sapiens (Human)                                                                                                                               | 18 | 53617   | 2  | 1.3  |
| 116 | TITIN | Titin (EC 2.7.11.1) (Connectin) (Rhabdomyosarcoma antigen MU-RMS-40.14) - Homo sapiens (Human)                                                                             | 17 | 3813810 | 20 | 0.2  |
| 117 | PSB3  | Proteasome subunit beta type 3 (EC 3.4.25.1) (Proteasome theta chain) (Proteasome chain 13) (Proteasome component C10-II) - Homo sapiens (Human)                           | 17 | 22933   | 4  | 8.8  |

Table S2 | 284 genes translationally reduced in Silvestrol

| Refseq name | RF DMSO (rpkm) | RF Silvestrol (rpkm) | mRNA DMSO (rpkm) | mRNA Silvestrol (rpkm) | $\Delta$ TE | z-score |
|-------------|----------------|----------------------|------------------|------------------------|-------------|---------|
| PAFAH1B1    | 108.22         | 11.80                | 19.51            | 28.85                  | -15.50      | -3.64   |
| ZNF664      | 16.37          | 1.92                 | 14.28            | 18.90                  | -14.59      | -3.55   |
| ARF6        | 437.98         | 79.25                | 58.64            | 86.33                  | -13.14      | -3.40   |
| KIAA0754    | 9.54           | 1.20                 | 12.01            | 17.67                  | -12.19      | -3.29   |
| HOMER1      | 5.13           | 0.55                 | 1.67             | 2.02                   | -11.72      | -3.23   |
| CCND2       | 4.35           | 1.03                 | 0.36             | 0.53                   | -11.53      | -3.21   |
| GSK3B       | 32.31          | 3.53                 | 6.60             | 8.27                   | -11.39      | -3.19   |
| GPBP1L1     | 10.50          | 1.81                 | 16.01            | 20.51                  | -9.76       | -2.97   |
| CDC42SE2    | 112.04         | 16.01                | 8.94             | 11.46                  | -9.42       | -2.91   |
| ARHGEF11    | 6.95           | 1.07                 | 9.79             | 11.21                  | -9.13       | -2.87   |
| CNTROB      | 8.29           | 1.59                 | 23.55            | 32.41                  | -8.95       | -2.84   |
| ASPHD1      | 13.17          | 1.69                 | 9.06             | 9.71                   | -8.93       | -2.84   |
| TLE1        | 19.37          | 2.96                 | 17.42            | 17.75                  | -8.78       | -2.81   |
| RAD17       | 3.89           | 0.77                 | 3.75             | 5.48                   | -8.76       | -2.81   |
| SRGAP2B     | 65.16          | 9.39                 | 18.97            | 18.37                  | -8.68       | -2.80   |
| CDC42BPA    | 22.27          | 4.30                 | 14.21            | 21.23                  | -8.40       | -2.75   |
| UBL3        | 27.36          | 5.76                 | 5.48             | 6.74                   | -8.35       | -2.74   |
| ARHGEF9     | 5.77           | 0.90                 | 4.15             | 5.94                   | -8.34       | -2.74   |
| TAOK1       | 26.89          | 3.32                 | 10.97            | 10.08                  | -8.31       | -2.73   |
| DDX6        | 118.73         | 25.11                | 18.38            | 26.63                  | -8.23       | -2.72   |
| ZNF45       | 2.24           | 0.58                 | 4.40             | 6.53                   | -8.19       | -2.71   |
| ANKRD42     | 7.46           | 1.13                 | 2.06             | 2.21                   | -8.10       | -2.69   |
| MORC2       | 17.93          | 3.84                 | 8.49             | 11.88                  | -8.08       | -2.69   |
| XPO1        | 162.63         | 34.48                | 44.30            | 63.89                  | -8.06       | -2.69   |
| FLNC        | 68.16          | 9.09                 | 45.65            | 36.19                  | -7.96       | -2.67   |
| HCFC1       | 35.39          | 6.49                 | 24.21            | 29.75                  | -7.94       | -2.67   |
| CAB39       | 141.76         | 24.38                | 25.54            | 34.34                  | -7.91       | -2.66   |
| TBC1D5      | 18.97          | 3.23                 | 5.47             | 6.56                   | -7.47       | -2.58   |
| SRGAP2      | 17.05          | 4.05                 | 10.22            | 12.95                  | -7.44       | -2.57   |
| RNF4        | 90.87          | 11.42                | 33.15            | 28.37                  | -7.41       | -2.57   |
| BHLHB9      | 3.55           | 0.64                 | 1.18             | 1.60                   | -7.37       | -2.56   |
| C10orf2     | 10.53          | 2.37                 | 8.51             | 11.81                  | -7.22       | -2.53   |
| NCOA1       | 7.32           | 1.28                 | 3.68             | 4.87                   | -7.17       | -2.52   |
| BCL2        | 4.08           | 0.99                 | 0.96             | 1.55                   | -7.04       | -2.49   |
| ARHGEF12    | 32.72          | 5.98                 | 30.52            | 40.75                  | -7.03       | -2.49   |
| BUD31       | 270.46         | 51.82                | 69.17            | 86.62                  | -7.02       | -2.49   |
| PPP1R9B     | 7.06           | 1.50                 | 24.98            | 22.03                  | -6.95       | -2.47   |
| MKKS        | 7.79           | 2.02                 | 29.99            | 40.25                  | -6.87       | -2.45   |
| NR2F1       | 3.47           | 0.95                 | 1.78             | 2.66                   | -6.83       | -2.45   |
| SAMD12      | 4.71           | 1.65                 | 0.59             | 0.64                   | -6.78       | -2.43   |
| SMURF2      | 80.95          | 19.66                | 59.16            | 76.32                  | -6.70       | -2.42   |
| VEPH1       | 1.78           | 0.45                 | 0.76             | 0.94                   | -6.68       | -2.41   |
| H1FO        | 290.32         | 64.80                | 87.37            | 100.97                 | -6.64       | -2.40   |

|          |        |        |       |        |       |       |
|----------|--------|--------|-------|--------|-------|-------|
| FYN      | 17.50  | 3.44   | 10.75 | 12.01  | -6.58 | -2.39 |
| QKI      | 127.51 | 23.89  | 14.75 | 16.08  | -6.58 | -2.39 |
| HPS4     | 6.74   | 1.49   | 6.23  | 9.13   | -6.50 | -2.37 |
| PTENP1   | 7.08   | 1.30   | 1.97  | 2.18   | -6.44 | -2.36 |
| CASKIN2  | 6.12   | 1.60   | 6.94  | 8.10   | -6.42 | -2.36 |
| PPP2CB   | 61.56  | 8.25   | 36.74 | 30.14  | -6.38 | -2.35 |
| APAF1    | 15.48  | 3.64   | 4.84  | 5.72   | -6.36 | -2.34 |
| HNRNPD   | 602.22 | 141.88 | 92.44 | 117.42 | -6.30 | -2.33 |
| HEXIM1   | 123.08 | 28.23  | 28.88 | 39.71  | -6.28 | -2.32 |
| YAP1     | 97.40  | 21.89  | 30.98 | 34.04  | -6.07 | -2.27 |
| SNX33    | 14.00  | 2.26   | 13.51 | 11.62  | -6.06 | -2.27 |
| SYTL4    | 7.23   | 1.93   | 2.84  | 3.43   | -6.05 | -2.27 |
| PLXNA2   | 1.91   | 0.29   | 4.73  | 5.46   | -6.01 | -2.26 |
| PPP1R3D  | 8.29   | 1.81   | 3.30  | 3.65   | -6.01 | -2.26 |
| SMEK2    | 28.71  | 7.87   | 8.92  | 12.69  | -6.01 | -2.26 |
| TARDBP   | 56.75  | 23.16  | 10.06 | 12.09  | -5.95 | -2.25 |
| ARAP2    | 1.23   | 0.38   | 0.73  | 0.98   | -5.94 | -2.24 |
| CNOT6    | 22.67  | 5.69   | 9.94  | 14.15  | -5.91 | -2.24 |
| TSC22D4  | 14.30  | 2.35   | 33.17 | 25.87  | -5.91 | -2.24 |
| MED13L   | 8.62   | 2.21   | 8.78  | 13.14  | -5.91 | -2.24 |
| GRLF1    | 20.90  | 4.76   | 20.71 | 25.66  | -5.86 | -2.22 |
| AHDC1    | 4.95   | 1.51   | 7.95  | 10.02  | -5.73 | -2.19 |
| PDZD2    | 0.47   | 0.17   | 0.86  | 1.15   | -5.51 | -2.13 |
| FAM196B  | 3.27   | 1.29   | 2.52  | 2.73   | -5.49 | -2.13 |
| GNAI1    | 36.65  | 12.24  | 5.05  | 7.57   | -5.49 | -2.13 |
| CNOT1    | 36.57  | 8.23   | 26.43 | 29.18  | -5.46 | -2.12 |
| JOSD1    | 22.29  | 4.36   | 30.84 | 29.69  | -5.39 | -2.10 |
| TMEM65   | 41.54  | 12.49  | 4.82  | 6.72   | -5.35 | -2.09 |
| C10orf18 | 16.49  | 5.46   | 9.62  | 13.67  | -5.32 | -2.08 |
| ENOX2    | 6.10   | 1.47   | 3.04  | 3.44   | -5.31 | -2.08 |
| SOX4     | 4.78   | 1.23   | 3.14  | 3.66   | -5.30 | -2.08 |
| MAGI1    | 10.53  | 2.32   | 7.61  | 9.13   | -5.28 | -2.07 |
| CENPN    | 56.19  | 14.75  | 13.49 | 16.18  | -5.21 | -2.05 |
| MPP5     | 92.86  | 25.94  | 16.79 | 22.39  | -5.16 | -2.04 |
| TCF12    | 31.91  | 10.18  | 9.19  | 12.41  | -5.16 | -2.04 |
| MAP3K11  | 6.96   | 1.20   | 48.78 | 37.37  | -5.16 | -2.04 |
| TPX2     | 357.83 | 112.81 | 93.42 | 119.76 | -5.13 | -2.03 |
| FAM49B   | 142.36 | 38.82  | 31.20 | 44.90  | -5.11 | -2.02 |
| ELK3     | 45.94  | 10.24  | 26.50 | 30.79  | -5.11 | -2.02 |
| WNK1     | 22.90  | 6.86   | 14.98 | 19.83  | -5.09 | -2.02 |
| OTUD4    | 4.82   | 1.20   | 2.51  | 3.53   | -5.08 | -2.02 |
| FOSL2    | 119.13 | 33.92  | 47.35 | 60.90  | -5.07 | -2.01 |
| MAN1A2   | 5.50   | 1.20   | 5.13  | 7.07   | -5.06 | -2.01 |
| SIPA1L1  | 12.22  | 3.72   | 14.44 | 19.09  | -5.04 | -2.00 |
| ARMCX3   | 31.45  | 9.62   | 8.44  | 11.23  | -5.02 | -2.00 |
| ZHX1     | 10.21  | 3.10   | 5.74  | 8.49   | -4.98 | -1.99 |
| KIAA2018 | 0.58   | 0.17   | 1.69  | 2.39   | -4.97 | -1.98 |

|          |        |        |        |        |       |       |
|----------|--------|--------|--------|--------|-------|-------|
| JAK2     | 2.23   | 0.76   | 1.00   | 1.50   | -4.96 | -1.98 |
| CDK6     | 89.23  | 25.08  | 8.75   | 11.17  | -4.95 | -1.98 |
| GPRASP2  | 7.96   | 1.66   | 3.86   | 3.22   | -4.93 | -1.97 |
| RTN4IP1  | 7.37   | 2.02   | 2.06   | 2.19   | -4.91 | -1.96 |
| RBBP7    | 636.60 | 156.92 | 144.47 | 172.97 | -4.90 | -1.96 |
| CSNK1G1  | 9.77   | 3.58   | 3.02   | 4.09   | -4.89 | -1.96 |
| STXBP5   | 4.84   | 1.20   | 2.50   | 2.62   | -4.87 | -1.95 |
| WNK3     | 2.54   | 0.71   | 0.89   | 0.93   | -4.85 | -1.95 |
| WHSC1L1  | 6.30   | 1.94   | 4.15   | 5.17   | -4.85 | -1.95 |
| PPP1CC   | 473.90 | 130.02 | 98.51  | 135.02 | -4.83 | -1.94 |
| ZHX3     | 15.52  | 4.96   | 8.50   | 10.89  | -4.82 | -1.94 |
| KIF4B    | 8.10   | 2.64   | 5.03   | 4.99   | -4.81 | -1.94 |
| SCYL2    | 10.37  | 3.13   | 4.71   | 6.14   | -4.81 | -1.93 |
| TEAD1    | 95.34  | 28.64  | 25.39  | 33.27  | -4.81 | -1.93 |
| FAM43A   | 3.10   | 0.58   | 7.26   | 6.26   | -4.81 | -1.93 |
| CSNK1G2  | 11.41  | 2.50   | 63.32  | 46.95  | -4.79 | -1.93 |
| ANKRD13C | 24.26  | 6.42   | 6.62   | 9.18   | -4.78 | -1.93 |
| LMO4     | 86.76  | 22.62  | 8.30   | 11.14  | -4.78 | -1.93 |
| MTMR15   | 5.01   | 1.50   | 3.35   | 3.98   | -4.78 | -1.92 |
| TAOK2    | 5.03   | 1.18   | 12.41  | 14.10  | -4.73 | -1.91 |
| CDK8     | 9.64   | 2.83   | 3.89   | 4.62   | -4.73 | -1.91 |
| PEG10    | 45.26  | 12.48  | 8.29   | 9.50   | -4.72 | -1.91 |
| C18orf55 | 28.93  | 6.58   | 10.43  | 11.85  | -4.70 | -1.90 |
| SPIN3    | 6.05   | 2.47   | 1.84   | 2.58   | -4.70 | -1.90 |
| TOR1AIP2 | 75.20  | 18.07  | 13.36  | 12.21  | -4.69 | -1.90 |
| MST4     | 25.72  | 7.48   | 4.41   | 5.23   | -4.69 | -1.90 |
| FAM55C   | 5.91   | 1.34   | 5.09   | 6.47   | -4.67 | -1.89 |
| ROCK1    | 23.69  | 7.71   | 7.51   | 9.37   | -4.67 | -1.89 |
| CSNK1A1  | 104.98 | 33.60  | 38.72  | 49.61  | -4.61 | -1.87 |
| OXNAD1   | 15.58  | 4.86   | 3.23   | 3.73   | -4.60 | -1.87 |
| FOXJ2    | 10.54  | 2.78   | 5.81   | 7.39   | -4.60 | -1.87 |
| CEP164   | 8.54   | 3.22   | 10.40  | 14.76  | -4.53 | -1.85 |
| FRYL     | 13.84  | 5.38   | 6.38   | 9.54   | -4.52 | -1.84 |
| SET      | 59.22  | 11.28  | 76.53  | 75.00  | -4.52 | -1.84 |
| PXMP3    | 20.47  | 5.30   | 5.84   | 6.77   | -4.51 | -1.84 |
| ALKBH3   | 34.23  | 10.55  | 16.55  | 19.68  | -4.50 | -1.84 |
| C18orf25 | 24.52  | 9.15   | 7.30   | 10.90  | -4.50 | -1.84 |
| DCLRE1A  | 6.51   | 2.64   | 3.26   | 4.82   | -4.49 | -1.84 |
| GABPB2   | 6.39   | 2.75   | 3.05   | 4.00   | -4.48 | -1.83 |
| MUDENG   | 23.11  | 7.06   | 7.71   | 11.03  | -4.47 | -1.83 |
| NUDT4    | 14.79  | 5.41   | 1.12   | 1.05   | -4.47 | -1.83 |
| STK11    | 12.51  | 2.76   | 37.28  | 32.28  | -4.46 | -1.83 |
| C3orf63  | 23.79  | 7.87   | 8.32   | 11.41  | -4.46 | -1.83 |
| PTPN21   | 6.58   | 2.12   | 7.16   | 9.68   | -4.45 | -1.82 |
| RAI1     | 7.19   | 2.88   | 9.81   | 12.40  | -4.44 | -1.82 |
| CLOCK    | 15.91  | 3.67   | 7.16   | 6.72   | -4.43 | -1.82 |
| ZDHHC5   | 11.79  | 2.50   | 32.06  | 37.00  | -4.42 | -1.81 |

|           |        |        |        |        |       |       |
|-----------|--------|--------|--------|--------|-------|-------|
| TAF7      | 195.99 | 61.64  | 77.99  | 108.96 | -4.42 | -1.81 |
| TTLL5     | 8.60   | 3.07   | 8.62   | 11.54  | -4.42 | -1.81 |
| ANKRA2    | 6.82   | 2.41   | 4.17   | 4.79   | -4.41 | -1.81 |
| ZFP91     | 44.06  | 14.89  | 26.44  | 37.82  | -4.41 | -1.81 |
| ZNF740    | 23.35  | 7.99   | 8.44   | 10.02  | -4.40 | -1.81 |
| NONO      | 145.82 | 42.87  | 35.86  | 36.04  | -4.40 | -1.80 |
| MAP3K7IP3 | 7.11   | 2.15   | 6.23   | 8.56   | -4.38 | -1.80 |
| CSNK2A1   | 57.42  | 30.47  | 25.21  | 23.66  | -4.36 | -1.79 |
| LOC284441 | 76.64  | 18.71  | 3.66   | 3.02   | -4.36 | -1.79 |
| CDC2L5    | 13.70  | 5.07   | 8.43   | 12.31  | -4.36 | -1.79 |
| NXT1      | 73.25  | 13.60  | 53.64  | 45.23  | -4.35 | -1.79 |
| IPO8      | 39.62  | 12.52  | 11.59  | 14.23  | -4.34 | -1.78 |
| TCEAL8    | 93.69  | 32.20  | 12.76  | 17.05  | -4.33 | -1.78 |
| UBE2H     | 134.32 | 28.55  | 23.33  | 23.37  | -4.32 | -1.78 |
| FASTKD1   | 2.46   | 0.80   | 1.68   | 1.87   | -4.31 | -1.78 |
| PIK3R3    | 4.75   | 1.54   | 1.20   | 1.75   | -4.30 | -1.77 |
| NFE2L1    | 23.90  | 4.69   | 65.43  | 62.65  | -4.30 | -1.77 |
| BCL9      | 4.22   | 1.41   | 3.96   | 4.67   | -4.30 | -1.77 |
| KLHL2     | 5.77   | 2.49   | 6.98   | 10.32  | -4.30 | -1.77 |
| ZNF609    | 6.96   | 2.70   | 6.12   | 7.35   | -4.29 | -1.77 |
| PUM2      | 45.26  | 16.75  | 19.83  | 28.02  | -4.29 | -1.77 |
| FAM126A   | 34.62  | 12.15  | 8.68   | 12.88  | -4.28 | -1.77 |
| RAB10     | 280.66 | 79.92  | 32.52  | 37.36  | -4.27 | -1.76 |
| DUSP16    | 5.36   | 2.03   | 4.12   | 5.80   | -4.27 | -1.76 |
| USP9X     | 59.40  | 16.01  | 20.04  | 21.86  | -4.27 | -1.76 |
| BBX       | 55.07  | 18.10  | 12.88  | 15.26  | -4.25 | -1.76 |
| FKTN      | 9.55   | 2.15   | 4.01   | 4.45   | -4.24 | -1.75 |
| CHST10    | 5.74   | 1.32   | 8.55   | 8.95   | -4.24 | -1.75 |
| PTER      | 38.21  | 13.83  | 4.89   | 6.72   | -4.23 | -1.75 |
| WDTC1     | 12.48  | 2.14   | 18.26  | 12.75  | -4.23 | -1.75 |
| SMARCD3   | 13.51  | 2.78   | 12.01  | 8.50   | -4.20 | -1.74 |
| PITPNA    | 80.43  | 20.72  | 25.34  | 26.42  | -4.20 | -1.74 |
| TMEM184C  | 10.56  | 1.95   | 9.35   | 10.81  | -4.20 | -1.74 |
| ABCE1     | 40.40  | 11.51  | 11.04  | 11.44  | -4.19 | -1.74 |
| TRIM44    | 70.92  | 23.82  | 20.78  | 29.98  | -4.19 | -1.74 |
| KIAA1211  | 1.03   | 0.46   | 0.42   | 0.59   | -4.19 | -1.73 |
| SH3BP5L   | 12.60  | 3.62   | 21.64  | 19.55  | -4.18 | -1.73 |
| ITPKB     | 1.09   | 0.41   | 1.28   | 1.09   | -4.18 | -1.73 |
| ATN1      | 14.79  | 3.57   | 32.48  | 30.03  | -4.17 | -1.73 |
| C10orf46  | 33.78  | 12.17  | 11.18  | 15.33  | -4.14 | -1.72 |
| XPO6      | 21.38  | 5.76   | 39.64  | 38.15  | -4.14 | -1.72 |
| MAPKAP1   | 47.36  | 10.24  | 46.26  | 37.89  | -4.14 | -1.72 |
| ZNF521    | 1.01   | 0.36   | 0.63   | 0.84   | -4.13 | -1.71 |
| GNG12     | 621.40 | 143.59 | 47.62  | 45.73  | -4.13 | -1.71 |
| H2AFY     | 366.70 | 86.90  | 156.92 | 147.19 | -4.13 | -1.71 |
| CCDC80    | 8.09   | 1.70   | 16.04  | 16.60  | -4.12 | -1.71 |
| FAM135A   | 1.93   | 1.02   | 1.28   | 1.76   | -4.12 | -1.71 |

|           |        |        |       |       |       |       |
|-----------|--------|--------|-------|-------|-------|-------|
| HS2ST1    | 17.97  | 4.51   | 6.99  | 9.29  | -4.12 | -1.71 |
| TOB2      | 22.18  | 9.78   | 7.21  | 9.94  | -4.11 | -1.71 |
| XRCC3     | 24.06  | 7.27   | 26.77 | 24.93 | -4.11 | -1.71 |
| BTBD7     | 7.56   | 2.59   | 5.05  | 6.70  | -4.10 | -1.70 |
| MAML2     | 18.01  | 6.35   | 8.44  | 11.55 | -4.10 | -1.70 |
| RCBTB1    | 15.71  | 5.85   | 5.11  | 6.94  | -4.09 | -1.70 |
| TCHP      | 32.27  | 13.77  | 10.67 | 15.00 | -4.08 | -1.70 |
| BTBD3     | 22.69  | 9.22   | 6.86  | 10.11 | -4.08 | -1.70 |
| HNRNPH3   | 305.88 | 112.80 | 38.07 | 47.44 | -4.08 | -1.70 |
| KYNU      | 6.40   | 2.38   | 1.15  | 1.40  | -4.07 | -1.69 |
| AFF3      | 4.58   | 2.38   | 2.03  | 2.71  | -4.07 | -1.69 |
| ARSJ      | 4.06   | 1.07   | 7.41  | 7.22  | -4.07 | -1.69 |
| ZNF672    | 5.52   | 1.68   | 20.37 | 19.82 | -4.05 | -1.68 |
| KLHL8     | 16.55  | 6.63   | 3.15  | 3.97  | -4.04 | -1.68 |
| SPATS2    | 16.65  | 6.93   | 7.13  | 10.58 | -4.03 | -1.68 |
| ANKIB1    | 15.66  | 4.91   | 11.64 | 15.30 | -4.03 | -1.68 |
| SAMD4B    | 22.91  | 5.82   | 21.45 | 19.79 | -4.02 | -1.67 |
| YME1L1    | 115.37 | 47.11  | 28.96 | 42.63 | -4.01 | -1.67 |
| ROCK2     | 44.87  | 18.35  | 10.29 | 14.62 | -4.01 | -1.67 |
| FBXL19    | 2.32   | 0.64   | 9.21  | 8.03  | -4.00 | -1.67 |
| ZFYVE1    | 13.38  | 4.48   | 8.64  | 10.64 | -3.98 | -1.66 |
| HIPK1     | 22.65  | 8.84   | 9.62  | 13.82 | -3.98 | -1.66 |
| LUZP1     | 25.09  | 9.00   | 9.85  | 11.38 | -3.98 | -1.66 |
| WDR24     | 5.50   | 1.42   | 7.36  | 6.58  | -3.97 | -1.66 |
| SAP30     | 42.94  | 19.53  | 25.66 | 30.45 | -3.96 | -1.65 |
| SMAD5     | 74.74  | 28.52  | 10.14 | 13.53 | -3.95 | -1.65 |
| RAB9B     | 8.73   | 1.44   | 1.36  | 1.03  | -3.95 | -1.65 |
| KIAA2026  | 0.54   | 0.22   | 0.95  | 1.38  | -3.95 | -1.65 |
| SETD3     | 36.86  | 12.54  | 19.68 | 24.17 | -3.94 | -1.65 |
| L3MBTL3   | 4.18   | 2.38   | 1.15  | 1.67  | -3.94 | -1.65 |
| PTPN11    | 7.72   | 2.24   | 11.35 | 9.82  | -3.94 | -1.64 |
| PNMA2     | 43.83  | 9.91   | 11.43 | 9.43  | -3.94 | -1.64 |
| JRK       | 7.57   | 2.24   | 5.94  | 6.49  | -3.93 | -1.64 |
| WDR26     | 79.72  | 30.23  | 17.21 | 24.33 | -3.93 | -1.64 |
| GRK5      | 4.23   | 1.20   | 7.05  | 7.43  | -3.92 | -1.64 |
| C1orf109  | 32.96  | 16.54  | 9.69  | 13.85 | -3.92 | -1.64 |
| JPH1      | 1.75   | 0.70   | 0.59  | 0.83  | -3.91 | -1.63 |
| LOC552889 | 94.29  | 24.34  | 20.50 | 19.69 | -3.90 | -1.63 |
| ERI1      | 77.38  | 30.18  | 7.72  | 11.30 | -3.90 | -1.63 |
| UBE2D2    | 284.11 | 85.40  | 46.80 | 49.96 | -3.89 | -1.63 |
| FAM168B   | 154.49 | 55.32  | 31.81 | 44.67 | -3.89 | -1.62 |
| ARMCX5    | 17.52  | 6.77   | 5.10  | 6.98  | -3.87 | -1.62 |
| EXOC5     | 13.60  | 6.76   | 4.57  | 6.65  | -3.86 | -1.62 |
| NUCKS1    | 522.60 | 171.82 | 70.17 | 87.45 | -3.85 | -1.61 |
| LRSAM1    | 17.54  | 5.14   | 11.44 | 11.98 | -3.85 | -1.61 |
| CAB39L    | 8.58   | 3.00   | 2.37  | 3.10  | -3.84 | -1.61 |
| DBF4B     | 6.51   | 2.59   | 6.64  | 8.33  | -3.84 | -1.61 |



|          |         |        |        |        |       |       |
|----------|---------|--------|--------|--------|-------|-------|
| CNKSR3   | 13.79   | 5.54   | 4.85   | 6.36   | -3.84 | -1.61 |
| TAF4B    | 2.44    | 0.87   | 1.85   | 2.60   | -3.83 | -1.60 |
| ADARB1   | 3.18    | 1.65   | 3.08   | 3.81   | -3.83 | -1.60 |
| NEK11    | 3.31    | 1.29   | 1.54   | 1.95   | -3.82 | -1.60 |
| BAZ1A    | 21.87   | 9.90   | 6.27   | 8.53   | -3.82 | -1.60 |
| ARL6     | 14.65   | 7.43   | 1.87   | 2.71   | -3.81 | -1.60 |
| CSNK1E   | 67.61   | 19.77  | 39.35  | 42.01  | -3.81 | -1.60 |
| SHB      | 26.98   | 7.45   | 17.03  | 16.77  | -3.81 | -1.59 |
| SPIN1    | 74.58   | 23.20  | 20.11  | 23.32  | -3.79 | -1.59 |
| PFTK1    | 7.56    | 3.65   | 1.83   | 2.62   | -3.79 | -1.59 |
| CDC2L6   | 9.85    | 3.06   | 3.22   | 3.74   | -3.79 | -1.59 |
| NCK2     | 15.77   | 4.85   | 17.39  | 22.12  | -3.79 | -1.59 |
| KIAA0430 | 6.96    | 2.13   | 5.90   | 5.87   | -3.79 | -1.59 |
| NSUN7    | 2.89    | 0.94   | 1.09   | 1.61   | -3.79 | -1.59 |
| ANLN     | 276.65  | 112.54 | 79.13  | 89.50  | -3.78 | -1.59 |
| FAM178A  | 19.05   | 8.14   | 7.43   | 8.73   | -3.77 | -1.58 |
| SYNCRIP  | 82.75   | 32.85  | 14.93  | 18.33  | -3.76 | -1.58 |
| SAMD9L   | 6.81    | 1.77   | 3.39   | 4.12   | -3.76 | -1.58 |
| GRB10    | 35.31   | 10.49  | 20.09  | 20.85  | -3.76 | -1.58 |
| KIAA0355 | 6.10    | 2.58   | 4.80   | 6.35   | -3.76 | -1.57 |
| PITPNC1  | 9.08    | 2.87   | 4.94   | 5.27   | -3.75 | -1.57 |
| UBP1     | 16.85   | 7.15   | 19.07  | 24.99  | -3.75 | -1.57 |
| NR2F2    | 101.53  | 45.16  | 27.70  | 39.53  | -3.74 | -1.57 |
| USP7     | 38.42   | 14.99  | 12.49  | 16.72  | -3.74 | -1.57 |
| NLRP10   | 2.43    | 1.17   | 0.44   | 0.47   | -3.74 | -1.57 |
| PPP2R5A  | 20.59   | 6.12   | 10.32  | 10.81  | -3.73 | -1.57 |
| C7orf49  | 49.09   | 18.47  | 42.03  | 47.31  | -3.73 | -1.57 |
| RAD21    | 241.17  | 120.68 | 55.46  | 82.81  | -3.73 | -1.56 |
| DGKH     | 3.01    | 1.57   | 0.96   | 1.36   | -3.71 | -1.56 |
| KPNB1    | 566.33  | 189.14 | 146.78 | 174.65 | -3.70 | -1.56 |
| IRS1     | 26.45   | 10.28  | 15.91  | 20.83  | -3.70 | -1.55 |
| PUS1     | 24.02   | 9.46   | 17.13  | 20.54  | -3.69 | -1.55 |
| DNAJC13  | 13.01   | 5.17   | 7.35   | 9.95   | -3.68 | -1.54 |
| RECQL    | 73.13   | 27.61  | 9.44   | 10.77  | -3.66 | -1.54 |
| HNRNPH2  | 145.79  | 54.78  | 22.85  | 27.50  | -3.66 | -1.54 |
| C1orf58  | 108.82  | 47.30  | 11.89  | 17.52  | -3.65 | -1.54 |
| DHX32    | 34.51   | 11.37  | 15.99  | 19.50  | -3.65 | -1.53 |
| CUL1     | 60.55   | 19.45  | 26.00  | 28.64  | -3.64 | -1.53 |
| DLG1     | 65.12   | 25.44  | 21.44  | 24.92  | -3.63 | -1.53 |
| LRRC1    | 16.82   | 5.73   | 4.62   | 5.61   | -3.63 | -1.52 |
| YWHAH    | 389.85  | 124.73 | 83.99  | 103.22 | -3.63 | -1.52 |
| PIK3CA   | 12.08   | 3.93   | 5.10   | 5.31   | -3.61 | -1.52 |
| SAPS3    | 118.43  | 51.30  | 22.58  | 33.64  | -3.61 | -1.52 |
| CCND1    | 1090.52 | 395.22 | 170.53 | 233.37 | -3.61 | -1.52 |
| LEF1     | 3.89    | 1.77   | 1.36   | 1.90   | -3.60 | -1.51 |
| EFCAB4B  | 4.77    | 1.61   | 3.14   | 3.10   | -3.59 | -1.51 |
| HNRPLL   | 58.64   | 21.24  | 15.14  | 16.84  | -3.59 | -1.51 |

|        |       |       |       |       |       |       |
|--------|-------|-------|-------|-------|-------|-------|
| TFCP2  | 18.83 | 8.06  | 6.25  | 8.31  | -3.59 | -1.51 |
| NOD1   | 1.28  | 0.43  | 2.53  | 3.13  | -3.57 | -1.50 |
| POLR2A | 67.46 | 27.39 | 28.64 | 34.14 | -3.57 | -1.50 |
| GINS1  | 92.87 | 33.02 | 12.12 | 14.09 | -3.57 | -1.50 |
| MKL2   | 7.47  | 3.26  | 2.27  | 2.99  | -3.57 | -1.50 |
| MLLT6  | 3.53  | 1.01  | 17.16 | 14.26 | -3.57 | -1.50 |

Table S3 | 146 genes translationally increased in Silvestrol

| Refseq name | RF DMSO (rpkm) | RF Silvestrol (rpkm) | mRNA DMSO (rpkm) | mRNA Silvestrol (rpkm) | $\Delta$ TE | z-score |
|-------------|----------------|----------------------|------------------|------------------------|-------------|---------|
| ANXA2       | 580.18         | 945.60               | 196.63           | 140.00                 | 19.00       | 4.64    |
| C17orf62    | 24.34          | 24.23                | 39.46            | 28.72                  | 4.56        | 2.56    |
| ABCC3       | 2.23           | 3.35                 | 12.87            | 9.90                   | 4.09        | 2.41    |
| S100A4      | 3695.17        | 5143.25              | 1702.79          | 1227.52                | 3.71        | 2.26    |
| TACSTD2     | 28.16          | 37.64                | 52.82            | 35.58                  | 3.69        | 2.26    |
| TMEM179B    | 38.15          | 65.22                | 60.23            | 40.21                  | 3.69        | 2.26    |
| IGFBP7      | 424.59         | 658.30               | 964.28           | 670.28                 | 3.59        | 2.22    |
| PPL         | 1.68           | 3.02                 | 5.28             | 4.06                   | 3.54        | 2.20    |
| PPAP2C      | 26.13          | 34.81                | 48.27            | 33.97                  | 3.52        | 2.19    |
| ENDOD1      | 10.62          | 13.49                | 17.97            | 13.92                  | 3.52        | 2.19    |
| ICMT        | 37.63          | 50.62                | 42.99            | 29.22                  | 3.43        | 2.15    |
| PIGU        | 11.44          | 15.76                | 20.97            | 15.79                  | 3.33        | 2.11    |
| LEPROTL1    | 25.20          | 31.82                | 10.27            | 7.02                   | 3.21        | 2.05    |
| COL6A1      | 9.96           | 15.05                | 34.46            | 24.01                  | 3.18        | 2.04    |
| LSR         | 6.77           | 9.31                 | 18.43            | 13.28                  | 3.14        | 2.02    |
| MAN2B2      | 6.50           | 9.33                 | 18.23            | 12.41                  | 3.10        | 2.00    |
| TNFSF10     | 78.90          | 87.16                | 34.59            | 36.59                  | 3.05        | 1.98    |
| PIGT        | 33.28          | 53.30                | 111.83           | 74.68                  | 3.04        | 1.97    |
| TM9SF4      | 30.20          | 38.49                | 37.40            | 25.89                  | 2.98        | 1.95    |
| POLR2L      | 2729.24        | 4800.23              | 588.55           | 412.64                 | 2.97        | 1.94    |
| ABCC1       | 10.03          | 15.86                | 20.42            | 15.24                  | 2.90        | 1.91    |
| TMEM222     | 36.60          | 51.82                | 34.23            | 24.74                  | 2.87        | 1.89    |
| S100A6      | 31483.13       | 54735.59             | 10200.04         | 7135.10                | 2.86        | 1.89    |
| SH3BGRL3    | 1713.32        | 2605.80              | 457.86           | 305.30                 | 2.86        | 1.89    |
| ACTB        | 2360.49        | 2010.27              | 1728.67          | 1407.16                | 2.86        | 1.89    |
| C22orf39    | 24.07          | 48.01                | 11.52            | 8.29                   | 2.85        | 1.88    |
| SLC39A13    | 35.28          | 58.46                | 92.64            | 65.94                  | 2.83        | 1.87    |
| RETSAT      | 15.92          | 23.07                | 26.54            | 22.52                  | 2.83        | 1.87    |
| PEX11B      | 20.82          | 30.20                | 11.76            | 8.22                   | 2.81        | 1.86    |
| POFUT2      | 11.74          | 16.00                | 22.68            | 15.46                  | 2.81        | 1.86    |
| AIG1        | 28.34          | 42.25                | 15.14            | 12.81                  | 2.77        | 1.84    |
| GPRC5A      | 152.19         | 199.35               | 93.83            | 63.71                  | 2.76        | 1.83    |
| POR         | 12.04          | 17.85                | 32.79            | 24.81                  | 2.75        | 1.83    |
| SLC35E1     | 16.42          | 22.86                | 25.09            | 18.00                  | 2.74        | 1.82    |
| SGSH        | 4.83           | 8.00                 | 12.28            | 9.02                   | 2.73        | 1.82    |
| CCDC107     | 22.41          | 39.14                | 61.54            | 45.63                  | 2.71        | 1.80    |
| SUMF2       | 78.50          | 112.69               | 125.75           | 95.46                  | 2.70        | 1.80    |
| TNFSF9      | 9.04           | 15.98                | 12.56            | 11.31                  | 2.70        | 1.80    |
| CLPTM1      | 31.14          | 43.69                | 92.24            | 66.01                  | 2.68        | 1.79    |
| RCE1        | 15.55          | 23.02                | 23.97            | 20.32                  | 2.68        | 1.79    |
| DOLPP1      | 16.15          | 30.63                | 16.89            | 13.90                  | 2.67        | 1.78    |
| HEG1        | 12.78          | 16.92                | 38.01            | 32.07                  | 2.66        | 1.78    |
| ZMYM6       | 46.68          | 61.73                | 26.20            | 22.49                  | 2.66        | 1.78    |

|           |        |        |        |        |      |      |
|-----------|--------|--------|--------|--------|------|------|
| ERAP1     | 16.99  | 18.39  | 9.87   | 6.83   | 2.64 | 1.77 |
| SSNA1     | 67.31  | 113.32 | 159.63 | 112.77 | 2.63 | 1.76 |
| KDELR1    | 299.29 | 333.95 | 203.54 | 157.24 | 2.61 | 1.75 |
| P4HB      | 224.00 | 329.00 | 482.32 | 338.26 | 2.61 | 1.75 |
| RPN1      | 78.61  | 112.92 | 143.75 | 108.28 | 2.61 | 1.75 |
| RPS4X     | 71.28  | 115.15 | 221.44 | 162.67 | 2.60 | 1.75 |
| DNAJC30   | 26.13  | 46.21  | 8.79   | 6.71   | 2.59 | 1.74 |
| KDELR2    | 222.33 | 315.33 | 112.43 | 106.04 | 2.59 | 1.74 |
| C19orf56  | 656.86 | 952.13 | 248.70 | 172.88 | 2.58 | 1.74 |
| RABAC1    | 192.49 | 241.07 | 199.58 | 136.61 | 2.58 | 1.73 |
| TMBIM1    | 80.83  | 84.70  | 127.02 | 85.11  | 2.57 | 1.73 |
| MMAB      | 49.02  | 75.29  | 14.42  | 11.58  | 2.56 | 1.72 |
| TMEM92    | 22.12  | 24.05  | 8.46   | 6.09   | 2.53 | 1.71 |
| SIAE      | 7.51   | 9.91   | 7.82   | 7.08   | 2.53 | 1.71 |
| TNFRSF12A | 318.88 | 471.65 | 374.89 | 310.04 | 2.52 | 1.70 |
| SIRT3     | 10.85  | 18.97  | 7.67   | 5.41   | 2.52 | 1.70 |
| TMED10    | 120.92 | 170.86 | 36.06  | 29.65  | 2.52 | 1.70 |
| LIPG      | 16.11  | 15.93  | 12.32  | 9.94   | 2.51 | 1.70 |
| APOL1     | 16.04  | 12.89  | 10.43  | 7.29   | 2.51 | 1.70 |
| RHBDD2    | 11.69  | 15.06  | 27.86  | 25.41  | 2.50 | 1.69 |
| C19orf10  | 274.73 | 347.78 | 338.15 | 261.22 | 2.49 | 1.68 |
| RPL4      | 100.35 | 90.55  | 94.16  | 65.84  | 2.49 | 1.68 |
| MED9      | 27.09  | 48.43  | 11.33  | 9.80   | 2.49 | 1.68 |
| NDUFAF3   | 224.44 | 386.56 | 77.41  | 55.37  | 2.49 | 1.68 |
| C16orf58  | 31.30  | 43.70  | 41.47  | 28.72  | 2.48 | 1.68 |
| SPPL2B    | 4.42   | 6.36   | 10.24  | 9.60   | 2.47 | 1.67 |
| NUDT8     | 18.44  | 33.97  | 16.34  | 14.38  | 2.47 | 1.67 |
| CTSH      | 14.90  | 17.59  | 28.83  | 21.92  | 2.46 | 1.67 |
| DPP7      | 22.93  | 33.31  | 125.37 | 85.31  | 2.46 | 1.66 |
| LTBP1     | 2.44   | 2.71   | 7.26   | 5.69   | 2.46 | 1.66 |
| URM1      | 166.17 | 231.29 | 93.59  | 65.99  | 2.45 | 1.66 |
| MSRB2     | 89.29  | 114.25 | 34.91  | 23.53  | 2.45 | 1.66 |
| RPLP2     | 764.19 | 854.45 | 589.50 | 597.22 | 2.45 | 1.66 |
| LEMD2     | 23.04  | 37.07  | 53.82  | 42.93  | 2.45 | 1.66 |
| TBL2      | 27.67  | 36.64  | 35.02  | 25.05  | 2.45 | 1.66 |
| C20orf108 | 13.58  | 22.25  | 10.17  | 9.27   | 2.45 | 1.66 |
| MCAM      | 11.91  | 17.65  | 25.37  | 17.60  | 2.45 | 1.66 |
| RNF121    | 16.69  | 19.27  | 18.91  | 13.74  | 2.45 | 1.66 |
| MYADM     | 127.98 | 194.51 | 84.97  | 80.03  | 2.45 | 1.66 |
| ZNF511    | 54.37  | 80.33  | 105.65 | 72.18  | 2.44 | 1.65 |
| MOCS3     | 12.85  | 22.53  | 6.06   | 4.39   | 2.43 | 1.65 |
| CD40      | 35.66  | 48.26  | 45.86  | 36.26  | 2.43 | 1.65 |
| VEGFB     | 9.06   | 17.66  | 105.33 | 74.54  | 2.43 | 1.65 |
| LEPRE1    | 21.66  | 29.60  | 50.45  | 37.09  | 2.43 | 1.65 |
| CEBPD     | 27.02  | 78.33  | 33.35  | 43.99  | 2.43 | 1.65 |
| GDE1      | 9.88   | 14.69  | 28.53  | 27.03  | 2.42 | 1.64 |
| WFS1      | 18.01  | 28.23  | 23.83  | 19.31  | 2.42 | 1.64 |

|           |         |         |        |        |      |      |
|-----------|---------|---------|--------|--------|------|------|
| ALG8      | 34.71   | 50.29   | 46.74  | 39.96  | 2.41 | 1.64 |
| ERP29     | 62.61   | 84.39   | 103.07 | 82.65  | 2.41 | 1.64 |
| C2orf79   | 133.85  | 187.04  | 113.36 | 80.48  | 2.40 | 1.63 |
| LMF2      | 16.79   | 26.81   | 49.92  | 40.56  | 2.39 | 1.63 |
| LSS       | 135.63  | 158.92  | 99.81  | 67.60  | 2.39 | 1.63 |
| B4GALT7   | 6.64    | 8.96    | 27.04  | 20.24  | 2.37 | 1.61 |
| SLC27A1   | 6.23    | 8.52    | 14.08  | 11.00  | 2.36 | 1.61 |
| DHCR24    | 64.22   | 66.25   | 102.11 | 74.87  | 2.36 | 1.61 |
| PTK6      | 10.76   | 16.28   | 8.36   | 6.45   | 2.36 | 1.60 |
| TXNDC5    | 179.03  | 269.27  | 226.74 | 172.15 | 2.35 | 1.60 |
| POLD4     | 104.89  | 135.60  | 100.16 | 69.39  | 2.35 | 1.60 |
| PIIB      | 482.97  | 645.32  | 493.22 | 409.82 | 2.34 | 1.59 |
| KIAA0090  | 18.91   | 25.72   | 19.91  | 13.37  | 2.33 | 1.59 |
| SLC17A5   | 16.69   | 19.23   | 18.45  | 15.57  | 2.32 | 1.58 |
| TPP1      | 22.98   | 28.87   | 28.57  | 20.83  | 2.32 | 1.58 |
| C4orf48   | 64.81   | 98.03   | 139.75 | 96.33  | 2.32 | 1.58 |
| EFEMP1    | 43.30   | 54.05   | 36.42  | 30.77  | 2.32 | 1.58 |
| COMMD9    | 84.75   | 120.27  | 19.87  | 14.13  | 2.32 | 1.58 |
| LAYN      | 20.72   | 23.80   | 48.12  | 34.30  | 2.32 | 1.58 |
| MARCH6    | 30.42   | 37.44   | 27.46  | 20.68  | 2.32 | 1.58 |
| ADPRHL2   | 64.31   | 98.89   | 61.59  | 42.42  | 2.30 | 1.57 |
| SIGMAR1   | 100.64  | 115.36  | 117.51 | 79.97  | 2.30 | 1.57 |
| SSR2      | 267.94  | 276.87  | 356.75 | 241.53 | 2.30 | 1.56 |
| RPL14     | 389.17  | 552.34  | 199.95 | 143.62 | 2.29 | 1.56 |
| PRCP      | 39.77   | 48.02   | 64.18  | 43.35  | 2.27 | 1.55 |
| TNFRSF10A | 21.37   | 29.01   | 16.37  | 12.68  | 2.27 | 1.55 |
| DHRS7B    | 25.07   | 36.09   | 34.24  | 26.72  | 2.27 | 1.55 |
| OVCA2     | 42.89   | 63.96   | 75.71  | 55.85  | 2.26 | 1.54 |
| C9orf5    | 14.91   | 22.21   | 20.64  | 20.08  | 2.26 | 1.54 |
| COX8A     | 2107.61 | 2939.84 | 950.56 | 764.02 | 2.25 | 1.53 |
| LAMP1     | 70.92   | 111.73  | 101.26 | 88.41  | 2.25 | 1.53 |
| PPT1      | 64.50   | 94.80   | 37.72  | 33.31  | 2.25 | 1.53 |
| UQCRQ     | 1203.23 | 1392.77 | 141.86 | 94.85  | 2.25 | 1.53 |
| KCNN4     | 24.98   | 29.19   | 43.07  | 33.20  | 2.24 | 1.53 |
| ERGIC3    | 123.93  | 147.48  | 282.35 | 192.77 | 2.24 | 1.53 |
| ITGB4     | 10.12   | 11.48   | 50.27  | 33.55  | 2.24 | 1.53 |
| HDHD1A    | 38.54   | 50.69   | 19.12  | 13.52  | 2.24 | 1.53 |
| POFUT1    | 39.19   | 55.61   | 43.83  | 32.58  | 2.24 | 1.53 |
| PIGO      | 7.23    | 10.17   | 14.00  | 10.54  | 2.23 | 1.52 |
| MRPL53    | 220.60  | 317.76  | 99.49  | 81.02  | 2.23 | 1.52 |
| SURF1     | 26.91   | 41.44   | 61.84  | 43.38  | 2.23 | 1.52 |
| CRELD1    | 7.29    | 7.76    | 12.73  | 10.63  | 2.23 | 1.52 |
| SIVA1     | 139.87  | 204.86  | 273.31 | 187.29 | 2.23 | 1.52 |
| CHMP6     | 48.80   | 63.63   | 39.07  | 26.51  | 2.22 | 1.52 |
| ZNF593    | 77.15   | 123.25  | 78.92  | 52.99  | 2.22 | 1.52 |
| GUSB      | 12.19   | 16.65   | 36.56  | 28.22  | 2.22 | 1.52 |
| ARL6IP5   | 171.95  | 177.43  | 51.35  | 36.91  | 2.22 | 1.52 |

|          |        |        |        |        |      |      |
|----------|--------|--------|--------|--------|------|------|
| PRDX4    | 135.30 | 182.90 | 260.14 | 199.52 | 2.22 | 1.51 |
| RNASEK   | 570.51 | 751.96 | 145.07 | 112.03 | 2.21 | 1.51 |
| FDX1L    | 42.83  | 73.17  | 56.60  | 41.18  | 2.21 | 1.51 |
| MPDU1    | 89.33  | 123.71 | 76.72  | 62.49  | 2.21 | 1.51 |
| RPS19BP1 | 87.76  | 128.05 | 119.24 | 81.55  | 2.21 | 1.51 |
| PCSK9    | 18.83  | 19.78  | 39.86  | 38.49  | 2.20 | 1.50 |
| ERAL1    | 101.68 | 154.06 | 81.72  | 57.45  | 2.20 | 1.50 |
| COX7A2   | 495.75 | 710.79 | 492.55 | 354.05 | 2.20 | 1.50 |
| PDDC1    | 64.70  | 100.34 | 28.41  | 22.07  | 2.20 | 1.50 |

Table S4 | 5'UTR characteristics of Silvestrol-sensitive and -insensitive genes

| Gene name      | $\Delta G$ value<br>CONTRAFold | $\Delta G$ value<br>McCaskill | 5'UTR<br>length | %GC<br>content | $\Delta TE$ | Gene<br>classification |
|----------------|--------------------------------|-------------------------------|-----------------|----------------|-------------|------------------------|
| ABCE1          | -92.02                         | -50.38                        | 565             | 55.22          | -4.19       | Sensitive              |
| ADRBK1         | -115.24                        | -89.19                        | 340             | 84.71          | -2.53       | Sensitive              |
| AGPAT6         | -158.9                         | -51.63                        | 977             | 51.28          | -2.41       | Sensitive              |
| AHDC1*         | -178.62                        | -69.57                        | 673             | 66.12          | -5.73       | Sensitive              |
|                | -202.1                         | -124.3                        | 1019            | 64.87          |             |                        |
| ALKBH3         | -130.85                        | -44.21                        | 461             | 58.13          | -4.50       | Sensitive              |
| ANKIB1         | -100.41                        | -66.71                        | 426             | 62.21          | -4.03       | Sensitive              |
| ANKRA2         | -135.92                        | -56.27                        | 709             | 53.17          | -4.41       | Sensitive              |
| ANKRD13C       | -35.11                         | -35.61                        | 364             | 67.03          | -4.78       | Sensitive              |
| ANKRD42        | -65.6                          | -44.43                        | 212             | 64.62          | -8.10       | Sensitive              |
| AP5M1 (MUDENG) | -77.61                         | -39.15                        | 456             | 51.97          | -4.47       | Sensitive              |
| APAF1          | -210.47                        | -82.05                        | 786             | 66.03          | -6.36       | Sensitive              |
| ARAP2          | -134.33                        | -49.57                        | 540             | 61.85          | -5.94       | Sensitive              |
| ARF3*          | -76.35                         | -10.28                        | 385             | 64.94          | -2.66       | Sensitive              |
|                | -70.12                         | -29.55                        | 289             | 62.28          |             |                        |
| ARF6           | -264.47                        | -78.72                        | 597             | 72.86          | -13.14      | Sensitive              |
| ARHGEF11       | -212.84                        | -103.55                       | 1090            | 38.90          | -9.13       | Sensitive              |
| ARHGEF12       | -38.29                         | -7.42                         | 216             | 51.85          | -7.03       | Sensitive              |
| ARHGEF7        | -120.98                        | -41.09                        | 300             | 80.33          | -2.80       | Sensitive              |
| ARHGEF9        | -150                           | -74.61                        | 851             | 54.05          | -8.34       | Sensitive              |
| ARMCX2*        | -28.74                         | -12.06                        | 504             | 53.17          | -3.02       | Sensitive              |
|                | -101.39                        | -26.46                        | 602             | 54.98          |             |                        |
|                | -48.19                         | -11.36                        | 405             | 50.37          |             |                        |
| ARMCX3*        | -74.61                         | -57.26                        | 916             | 56.11          | -5.02       | Sensitive              |
|                | -139                           | -10.84                        | 596             | 56.21          |             |                        |
|                | -100.22                        | -35.23                        | 506             | 56.13          |             |                        |
| AR SJ          | -237.51                        | -76.48                        | 917             | 58.34          | -4.07       | Sensitive              |
| ASPHD1*        | -22.1                          | -2.1                          | 302             | 61.26          | -8.93       | Sensitive              |
|                | -6.6                           | -3.18                         | 164             | 58.54          |             |                        |
|                | -6.6                           | -3.18                         | 164             | 58.54          |             |                        |
| ASTN2          | -43.28                         | -23.29                        | 257             | 59.53          | -3.20       | Sensitive              |
| ATN1*          | -68.76                         | -21.66                        | 287             | 52.96          | -4.17       | Sensitive              |
|                | -42.85                         | -19.43                        | 284             | 56.34          |             |                        |
|                | -46.99                         | -23.64                        | 215             | 49.30          |             |                        |
| ATXN7L3        | -19.11                         | -11.54                        | 141             | 53.19          | -3.21       | Sensitive              |
| BBX            | -41.3                          | -14.44                        | 337             | 51.63          | -4.25       | Sensitive              |
| BCL9           | -111.33                        | -35.63                        | 790             | 50.51          | -4.30       | Sensitive              |
| BHLHB9*        | -67.86                         | -14.3                         | 578             | 52.94          | -7.37       | Sensitive              |
|                | -109.71                        | -48.51                        | 689             | 50.36          |             |                        |
|                | -91.92                         | -45.42                        | 635             | 48.35          |             |                        |
|                | -125.22                        | -44.8                         | 543             | 54.88          |             |                        |
|                | -106.48                        | -62.06                        | 638             | 51.72          |             |                        |
| BMPR2          | -127.95                        | -75.94                        | 589             | 59.59          | -2.79       | Sensitive              |

|           |         |         |      |       |        |           |
|-----------|---------|---------|------|-------|--------|-----------|
| BTBD7     | -47.16  | -6.28   | 358  | 63.69 | -4.10  | Sensitive |
| BUD31*    | -132.12 | -47.52  | 483  | 53.00 | -7.02  | Sensitive |
|           | -69.09  | -19.02  | 579  | 57.34 |        |           |
| C10orf2   | -43.96  | -17.54  | 235  | 51.49 | -7.22  | Sensitive |
| C16orf48  | -102.54 | -53.5   | 372  | 76.34 | -2.87  | Sensitive |
| C6orf106  | -75.2   | -32.88  | 294  | 70.41 | -3.04  | Sensitive |
| CAB39*    | -135.64 | -70.41  | 479  | 74.95 | -7.91  | Sensitive |
|           | -177.73 | -85.36  | 604  | 59.11 |        |           |
|           | -76.55  | -29.02  | 348  | 61.21 |        |           |
| CAB39L*   | -61.84  | -16.92  | 548  | 41.61 | -3.84  | Sensitive |
|           | -57.03  | -31.39  | 395  | 42.78 |        |           |
|           | -67.33  | -22.9   | 436  | 45.41 |        |           |
|           | -45.62  | -17.14  | 501  | 40.52 |        |           |
| CACUL1    | -204.28 | -68.42  | 534  | 70.79 | -4.14  | Sensitive |
| CAMK1D    | -140.17 | -51.95  | 387  | 74.68 | -3.02  | Sensitive |
| CASKIN2   | -98.08  | -47.85  | 637  | 64.68 | -6.42  | Sensitive |
| CCDC80*   | -61.92  | -37.43  | 1004 | 46.02 | -4.12  | Sensitive |
|           | -29.59  | -6.92   | 438  | 43.38 |        |           |
| CCND1     | -46.89  | -14.01  | 277  | 64.62 | -3.61  | Sensitive |
| CCND2     | -98.85  | -44.15  | 319  | 63.01 | -11.53 | Sensitive |
| CCNI      | -138.63 | -44.5   | 627  | 64.75 | -2.85  | Sensitive |
| CDC42BPA  | -288.01 | -182.49 | 1342 | 53.06 | -8.40  | Sensitive |
| CDC42SE2* | -86.84  | -32     | 596  | 45.30 | -9.42  | Sensitive |
|           | -83.95  | -39.1   | 493  | 51.52 |        |           |
|           | -65.91  | -17.29  | 571  | 43.96 |        |           |
| CDK6*     | -108.33 | -48.12  | 462  | 69.05 | -4.95  | Sensitive |
|           | -147.97 | -45.38  | 534  | 70.04 |        |           |
| CDK8      | -150.46 | -52.59  | 553  | 71.61 | -4.73  | Sensitive |
| CENPN     | -170.77 | -87.39  | 840  | 66.90 | -5.21  | Sensitive |
| CHMP4B    | -58.3   | -11.34  | 215  | 78.60 | -3.33  | Sensitive |
| CHST10*   | -91.24  | -38.6   | 436  | 69.27 | -4.24  | Sensitive |
|           | -81.72  | -56.4   | 317  | 57.41 |        |           |
| CLOCK*    | -23.91  | -10.09  | 301  | 35.55 | -4.43  | Sensitive |
|           | -95.59  | -30.29  | 976  | 42.11 |        |           |
|           | -134.83 | -85.77  | 696  | 54.17 |        |           |
| CMTM4     | -105.86 | -35.88  | 232  | 84.48 | -3.08  | Sensitive |
| CNN3*     | -31.87  | -15.5   | 133  | 64.66 | -3.33  | Sensitive |
|           | -209.33 | -107.71 | 434  | 73.27 |        |           |
| CNOT1     | -51.89  | -31.92  | 383  | 54.83 | -5.46  | Sensitive |
| CNOT6*    | -56.59  | -18.06  | 399  | 72.43 | -5.91  | Sensitive |
|           | -121.41 | -47.65  | 474  | 61.39 |        |           |
| CNTROB    | -195.69 | -87.19  | 975  | 58.15 | -8.95  | Sensitive |
| CSNK1E*   | -13.05  | -8.65   | 161  | 54.66 | -3.81  | Sensitive |
|           | -80.8   | -34.79  | 342  | 82.16 |        |           |
|           | -40.35  | -2.36   | 311  | 81.67 |        |           |
|           | -104.11 | -35.99  | 516  | 52.71 |        |           |
|           | -36.95  | -31.06  | 143  | 74.83 |        |           |



|           |         |         |     |       |       |           |
|-----------|---------|---------|-----|-------|-------|-----------|
| CSNK1G1   | -70.9   | -29.77  | 474 | 52.11 | -4.89 | Sensitive |
| CSNK1G2   | -137.85 | -45.48  | 572 | 72.73 | -4.79 | Sensitive |
| CTNND1    | -85.78  | -40.45  | 586 | 49.32 | -2.79 | Sensitive |
| CTXN1     | -118.8  | -70.86  | 270 | 80.00 | -3.17 | Sensitive |
| CUL1*     | -64.67  | -39.27  | 400 | 58.75 | -3.64 | Sensitive |
|           | -76.32  | -25.66  | 576 | 46.18 |       |           |
| CUL3      | -75.46  | -36.78  | 389 | 76.61 | -3.07 | Sensitive |
| DARS2     | -145.97 | -66.24  | 777 | 52.51 | -3.48 | Sensitive |
| DDIT4L    | -87.62  | -58.13  | 265 | 66.04 | -4.16 | Sensitive |
| DDX6*     | -42.16  | -25.02  | 356 | 41.85 | -8.23 | Sensitive |
|           | -36.49  | -21.82  | 411 | 43.07 |       |           |
|           | -40.72  | -11.22  | 342 | 40.35 |       |           |
| DENND4B   | -215.2  | -89.16  | 469 | 78.04 | -3.06 | Sensitive |
| DGCR8     | -93.5   | -37.9   | 479 | 58.87 | -3.07 | Sensitive |
| DHX32     | -54.04  | -36.03  | 541 | 40.48 | -3.65 | Sensitive |
| DPYSL3    | -99.6   | -50.58  | 422 | 63.98 | -2.38 | Sensitive |
| DVL3      | -103.43 | -53.21  | 298 | 77.85 | -3.05 | Sensitive |
| DYNLL2    | -120.61 | -41.71  | 328 | 72.56 | -3.49 | Sensitive |
| EFCAB4B   | -65.46  | -7.77   | 524 | 60.50 | -3.59 | Sensitive |
| EFNB2     | -61.1   | -33.77  | 200 | 68.50 | -2.10 | Sensitive |
| EIF4EBP2  | -15.74  | -7.96   | 73  | 75.34 | -2.26 | Sensitive |
| ELK3      | -95.2   | -40.26  | 376 | 58.78 | -5.11 | Sensitive |
| ENOX1*    | -86.3   | -60.53  | 628 | 57.96 | -3.13 | Sensitive |
|           | -44.88  | -5.56   | 306 | 44.77 |       |           |
| ENOX2*    | -97.4   | -23.15  | 468 | 54.91 | -5.31 | Sensitive |
|           | -1.9    | -1.88   | 72  | 45.83 |       |           |
| EPB49*    | -92.66  | -52.3   | 322 | 72.05 | -2.48 | Sensitive |
|           | -118.22 | -50.5   | 512 | 66.80 |       |           |
| EXOC3*    | 6.24    | -3.27   | 107 | 55.14 | -3.47 | Sensitive |
|           | -8.5    | -8.07   | 239 | 71.97 |       |           |
| EXT1      | -137.4  | -56.61  | 857 | 59.28 | -2.54 | Sensitive |
| FAM120AOS | -189.94 | -81.81  | 933 | 49.52 | -3.57 | Sensitive |
| FAM126A   | -75.33  | -38.15  | 283 | 58.66 | -4.28 | Sensitive |
| FAM168B*  | -80.15  | -26.03  | 308 | 71.10 | -3.89 | Sensitive |
|           | -32.35  | -13.18  | 158 | 66.46 |       |           |
| FAM176A*  | -58.45  | -26.91  | 488 | 50.00 | -3.08 | Sensitive |
|           | -89.47  | -53.94  | 475 | 64.63 |       |           |
|           | -71.7   | -17.08  | 283 | 55.48 |       |           |
|           | -105.71 | -33.25  | 588 | 61.39 |       |           |
| FAM208A   | 0       | -4.03   | 61  | 68.85 | -4.46 | Sensitive |
| FAM3A*    | -155.78 | -47.72  | 417 | 70.02 | -1.66 | Sensitive |
|           | -66.02  | -33.69  | 238 | 66.39 |       |           |
|           | -129.98 | -83.91  | 517 | 69.83 |       |           |
| FAM43A    | -294.38 | -141.83 | 984 | 65.55 | -4.81 | Sensitive |
|           | -47.12  | -34.43  | 427 | 52.93 |       |           |
|           | -115.64 | -56.85  | 451 | 62.31 |       |           |
|           | -89.47  | -36.23  | 324 | 66.05 |       |           |

|           |         |         |      |       |        |           |
|-----------|---------|---------|------|-------|--------|-----------|
| FAM49B*   | -45.52  | -24.9   | 305  | 50.82 | -5.11  | Sensitive |
|           | -41.87  | -15.97  | 371  | 51.48 |        |           |
|           | -88.93  | -43.5   | 599  | 53.92 |        |           |
|           | -56.93  | -32.36  | 234  | 58.97 |        |           |
| FAM53B*   | -58.06  | -22.91  | 262  | 62.60 | -3.81  | Sensitive |
|           | -202.95 | -106.08 | 767  | 54.50 |        |           |
| FAN1      | -40.97  | -32.5   | 341  | 51.61 | -4.78  | Sensitive |
| FASTKD1   | -23.69  | -8.16   | 397  | 42.82 | -4.31  | Sensitive |
| FBF1      | -74.93  | -27.84  | 324  | 67.28 | -4.91  | Sensitive |
| FBLIM1*   | -145.84 | -86.84  | 493  | 60.65 | -3.56  | Sensitive |
|           | -210.96 | -103.93 | 690  | 69.28 |        |           |
| FBXL14    | -73.2   | -36.76  | 149  | 73.15 | -3.54  | Sensitive |
| FBXL19    | -60.11  | -32.12  | 208  | 63.94 | -4.00  | Sensitive |
| FKTN      | -4.3    | 0.53    | 174  | 41.38 | -4.24  | Sensitive |
| FLNC      | -40.32  | -22.81  | 311  | 73.63 | -7.96  | Sensitive |
| FLYWCH1   | -153.44 | -65.12  | 393  | 71.50 | -2.08  | Sensitive |
| FNBP1     | -18.94  | -61.99  | 269  | 76.58 | -3.33  | Sensitive |
| FOSL2     | -265.92 | -122.09 | 913  | 67.91 | -5.07  | Sensitive |
| FOXJ2     | -303.38 | -101.19 | 1195 | 64.44 | -4.60  | Sensitive |
| FOXP4*    | -6.9    | -6.39   | 62   | 56.45 | -3.16  | Sensitive |
|           | -178.92 | -45.95  | 508  | 79.53 |        |           |
| FYN*      | -191.84 | -96.63  | 565  | 72.39 | -6.58  | Sensitive |
|           | -61.54  | -10.74  | 272  | 55.51 |        |           |
|           | 0       | 0       | 61   | 39.34 |        |           |
| GBP2*     | -70.31  | -28.55  | 319  | 47.96 | -2.26  | Sensitive |
|           | -109.35 | -54.44  | 888  | 48.42 |        |           |
| GINS1     | -4      | -8.61   | 144  | 61.11 | -3.57  | Sensitive |
| GNAI1     | -83.3   | -48.06  | 423  | 72.10 | -5.49  | Sensitive |
| GNAO1     | -63.2   | -22.81  | 310  | 64.19 | -2.86  | Sensitive |
| GNB1*     | -24.32  | -16.22  | 203  | 53.69 | -2.59  | Sensitive |
|           | -56.28  | -18.04  | 382  | 68.85 |        |           |
| GNG12     | -38.3   | -15.76  | 250  | 56.40 | -4.13  | Sensitive |
| GPBP1L1*  | -176.8  | -87     | 1272 | 41.59 | -9.76  | Sensitive |
|           | -196.68 | -68.83  | 1411 | 43.59 |        |           |
| GPR137    | -41.4   | -17.56  | 155  | 62.58 | -2.08  | Sensitive |
| GPR161*   | -14.8   | -14.12  | 129  | 58.14 | -2.65  | Sensitive |
|           | -80.8   | -42.74  | 359  | 58.22 |        |           |
|           | -163    | -46.57  | 607  | 58.65 |        |           |
|           | -76.72  | -27.33  | 364  | 60.99 |        |           |
| GPRASP2*  | -126.32 | -64.59  | 670  | 52.09 | -4.93  | Sensitive |
|           | -222.53 | -88.79  | 969  | 53.04 |        |           |
|           | -187    | -89.67  | 881  | 53.46 |        |           |
| GPRIN1    | -68.31  | -29.56  | 228  | 73.25 | -2.71  | Sensitive |
| GRB10*    | -2.05   | -2.38   | 81   | 46.91 | -3.76  | Sensitive |
|           | -112.56 | -6.78   | 520  | 62.31 |        |           |
| GRK5      | -24.2   | -17.04  | 379  | 69.39 | -3.92  | Sensitive |
| GSK3B_001 | -34.05  | -14.66  | 282  | 41.84 | -76.39 | Sensitive |

|               |         |         |      |       |        |           |
|---------------|---------|---------|------|-------|--------|-----------|
| GSK3B_002     | -34.05  | -14.66  | 282  | 41.84 | -11.39 | Sensitive |
| H1FO          | -92.91  | -36.61  | 488  | 70.08 | -6.64  | Sensitive |
| H2AFV         | -23.8   | -6.83   | 142  | 80.99 | -2.71  | Sensitive |
| H2AFY*        | -184.52 | -98.11  | 644  | 71.58 | -4.13  | Sensitive |
|               | -19.4   | -9.79   | 182  | 55.49 |        |           |
| HCFC1         | -300.55 | -197.79 | 1017 | 65.09 | -7.94  | Sensitive |
| HEXIM1        | -364.36 | -174.07 | 1924 | 54.83 | -6.28  | Sensitive |
| HNRNPC*       | -83.74  | -34.39  | 290  | 54.48 | -4.04  | Sensitive |
|               | -66.33  | -21.89  | 571  | 50.61 |        |           |
|               | -43.4   | -14.28  | 214  | 53.27 |        |           |
|               | -37.41  | -21.34  | 240  | 50.83 |        |           |
| HNRNPD        | -66.4   | -45.76  | 328  | 68.60 | -6.30  | Sensitive |
| HNRNPH3       | -39.2   | -15.04  | 215  | 53.02 | -4.08  | Sensitive |
| HNRPLL        | -93.34  | -72.12  | 390  | 72.82 | -3.59  | Sensitive |
| HOMER1        | -338.1  | -168.78 | 1493 | 59.81 | -11.72 | Sensitive |
| HPS4          | -65.82  | -44.27  | 350  | 42.57 | -6.50  | Sensitive |
| HS2ST1        | -126.83 | -78.93  | 408  | 69.12 | -4.12  | Sensitive |
| IFT27 (RABL4) | -104.55 | -70.52  | 496  | 66.94 | -2.46  | Sensitive |
| IGF1R         | -181.18 | -52.92  | 661  | 64.60 | -3.12  | Sensitive |
| IPO8          | -88.35  | -17.27  | 389  | 65.04 | -4.34  | Sensitive |
| JAK2*         | -159.81 | -49.63  | 544  | 66.73 | -4.96  | Sensitive |
|               | -31.35  | -16.64  | 163  | 57.67 |        |           |
| JOSD1         | -89.8   | -51.84  | 730  | 52.33 | -5.39  | Sensitive |
| JRK           | -169.64 | -72.14  | 564  | 63.48 | -3.93  | Sensitive |
| KANK2         | -28.08  | -7.93   | 129  | 58.91 | -3.15  | Sensitive |
| KIAA0430      | -10.1   | -4.79   | 257  | 60.70 | -3.79  | Sensitive |
| KIAA0494      | -303.39 | -159.21 | 1027 | 61.05 | -2.70  | Sensitive |
| KIAA0754      | -22.59  | 0.64    | 245  | 45.71 | -12.19 | Sensitive |
| KIAA2018*     | -152.94 | -71.9   | 461  | 63.34 | -4.97  | Sensitive |
|               | 0       | 0       | 68   | 42.65 |        |           |
| KIF3C*        | -118.4  | -60.65  | 630  | 67.78 | -2.82  | Sensitive |
|               | -247.3  | -76.69  | 623  | 72.23 |        |           |
| KIF4A         | -5      | 0       | 132  | 59.85 | -3.55  | Sensitive |
| KIF4B         | -22.14  | -16.72  | 155  | 55.48 | -4.81  | Sensitive |
| KPNB1         | -86.71  | -30.22  | 457  | 68.71 | -3.70  | Sensitive |
| LHFPL2*       | -41.85  | -8.75   | 361  | 59.00 | -1.61  | Sensitive |
|               | -200.79 | -102.16 | 726  | 63.77 |        |           |
| LMO4*         | -244.33 | -139.6  | 830  | 71.20 | -4.78  | Sensitive |
|               | -28.88  | -15.3   | 200  | 65.00 |        |           |
| LPHN2*        | -5.71   | -3.11   | 232  | 34.91 | -2.11  | Sensitive |
|               | -32.01  | -18.62  | 266  | 42.48 |        |           |
| LRP1          | -148.85 | -20.69  | 516  | 65.89 | -2.42  | Sensitive |
| LRRC1         | -75.2   | -25.55  | 327  | 74.01 | -3.63  | Sensitive |
| LRSAM1*       | -127.54 | -47.03  | 422  | 63.51 | -3.85  | Sensitive |
|               | -123.62 | -40.73  | 654  | 61.62 |        |           |
|               | 0       | 0       | 127  | 56.69 |        |           |
|               | -170.1  | -45.99  | 852  | 62.09 |        |           |

|          |         |         |      |       |       |           |
|----------|---------|---------|------|-------|-------|-----------|
| LUZP1*   | -17.1   | -10.25  | 278  | 49.28 | -3.98 | Sensitive |
|          | -79.74  | -22.42  | 449  | 53.45 |       |           |
| MAML2*   | -222.34 | -99.85  | 1335 | 45.54 | -4.10 | Sensitive |
|          | -169.52 | -102.02 | 1113 | 46.36 |       |           |
| MAN1A2   | -122.19 | -59.46  | 785  | 54.27 | -5.06 | Sensitive |
| MAP2K1   | -281.53 | -133    | 581  | 73.67 | -2.89 | Sensitive |
| MAP3K11  | -226.8  | -93.31  | 536  | 69.78 | -5.16 | Sensitive |
| MAP3K3   | -139.51 | -66.39  | 370  | 80.00 | -2.53 | Sensitive |
| MAP4K4   | -150.61 | -50.3   | 387  | 73.90 | -3.53 | Sensitive |
| MAP7D1   | -55.14  | -29.19  | 266  | 78.57 | -3.32 | Sensitive |
| MAPK14   | -145.09 | -66.62  | 438  | 71.92 | -2.91 | Sensitive |
| MAPK9    | -96.06  | -35.86  | 321  | 73.83 | -2.98 | Sensitive |
| MAPKAP1* | -131.66 | -59.24  | 383  | 64.49 | -4.14 | Sensitive |
|          | -5.23   | -7.03   | 119  | 42.02 |       |           |
| MARK1    | -52.89  | -5.26   | 316  | 74.68 | -4.20 | Sensitive |
| MBNL3    | -11.51  | -3.45   | 129  | 34.88 | -2.78 | Sensitive |
| MED13L   | -100.7  | -66.13  | 257  | 84.44 | -5.91 | Sensitive |
| MGAT2    | -167.61 | -90.59  | 548  | 70.07 | -2.29 | Sensitive |
| MIB1     | -105.67 | -93.32  | 314  | 78.98 | -3.25 | Sensitive |
| MID2     | -139.5  | -72.4   | 598  | 70.07 | -3.49 | Sensitive |
| MKKS*    | -83.14  | -57.86  | 813  | 41.45 | -6.87 | Sensitive |
|          | -92.56  | -37.64  | 937  | 38.63 |       |           |
| MLLT6    | -13.88  | -4.87   | 141  | 75.18 | -3.57 | Sensitive |
| MMP14    | -40.74  | -17.41  | 311  | 61.41 | -2.82 | Sensitive |
| MOB3A    | -81.96  | -21.57  | 368  | 60.60 | -3.13 | Sensitive |
| MORC2    | -120.79 | -67.68  | 1414 | 37.41 | -8.08 | Sensitive |
| MPP5     | -163.23 | -54.6   | 711  | 55.98 | -5.16 | Sensitive |
| MREG*    | -118.74 | -29.71  | 346  | 71.97 | -2.19 | Sensitive |
|          | -115.47 | -57.24  | 244  | 79.10 |       |           |
| MSI2     | -36.53  | -28.22  | 259  | 72.20 | -2.36 | Sensitive |
| MST4     | -104.38 | -52.45  | 303  | 68.65 | -4.69 | Sensitive |
| NCK2*    | -87.7   | -69.09  | 492  | 63.82 | -3.79 | Sensitive |
|          | -10.55  | -8.03   | 182  | 51.65 |       |           |
| NCOA1*   | -30.61  | -11     | 308  | 42.21 | -7.17 | Sensitive |
|          | -120.69 | -52.59  | 702  | 53.99 |       |           |
| NFE2L1   | -107.86 | -53.03  | 666  | 53.90 | -4.30 | Sensitive |
| NLRC5    | -83.59  | -19.86  | 275  | 60.36 | -2.08 | Sensitive |
| NOD1     | -131.58 | -60.04  | 576  | 53.65 | -3.57 | Sensitive |
| NOG      | -72.47  | -33.86  | 575  | 75.83 | -3.43 | Sensitive |
| NONO*    | -50.83  | -4.3    | 255  | 53.33 | -4.40 | Sensitive |
|          | -33.82  | -7.79   | 148  | 52.70 |       |           |
|          | -49.69  | -13.63  | 362  | 48.90 |       |           |
| NOTCH2   | -75.02  | -33.22  | 270  | 72.96 | -2.95 | Sensitive |
| NPAS2    | -153.11 | -69.14  | 335  | 75.22 | -2.73 | Sensitive |
| NR1H2    | -84.54  | -29.38  | 326  | 62.88 | -3.10 | Sensitive |
| NR2C2AP  | -89.88  | -42     | 396  | 58.08 | -2.35 | Sensitive |
| NR2F1    | -369.06 | -149.97 | 1737 | 64.25 | -6.83 | Sensitive |

|                 |         |         |      |       |        |           |
|-----------------|---------|---------|------|-------|--------|-----------|
| NRP2            | -231.49 | -96.85  | 841  | 55.17 | -3.53  | Sensitive |
| NSUN7           | -92.66  | -28.89  | 545  | 68.81 | -3.79  | Sensitive |
| NUCKS1          | -76.41  | -29.03  | 353  | 63.46 | -3.85  | Sensitive |
| NUDT4           | -132.32 | -92.18  | 477  | 74.00 | -4.47  | Sensitive |
| NUP62*          | -115.48 | -45.89  | 486  | 59.47 | -3.35  | Sensitive |
|                 | -85.16  | -28.93  | 307  | 61.89 |        |           |
|                 | -67.94  | -40.62  | 331  | 62.84 |        |           |
| NXPE3 (FAM55C)* | -117.62 | -46.67  | 642  | 47.82 | -4.67  | Sensitive |
|                 | -26.74  | -6.32   | 247  | 42.91 |        |           |
|                 | -66.61  | -33.84  | 951  | 36.49 |        |           |
|                 | -84.98  | -40.3   | 1006 | 52.49 |        |           |
| NXT1            | -117.47 | -27.11  | 437  | 69.57 | -4.35  | Sensitive |
| ODC1*           | -136.44 | -28.78  | 561  | 67.02 | -3.16  | Sensitive |
|                 | -73.95  | -35.29  | 484  | 49.38 |        |           |
| OSBPL2          | -58.81  | -34.18  | 252  | 53.97 | -3.30  | Sensitive |
| OTUD4           | -32.89  | -19.12  | 188  | 48.40 | -5.08  | Sensitive |
| OXNAD1          | -118.31 | -75.16  | 515  | 53.20 | -4.60  | Sensitive |
| PABPC4          | -154.22 | -87.52  | 500  | 64.80 | -3.38  | Sensitive |
| PAFAH1B1        | -138.72 | -56.27  | 501  | 57.09 | -15.50 | Sensitive |
| PDE6D           | -75.4   | -33.71  | 245  | 68.57 | -2.58  | Sensitive |
| PDE7B           | -25.61  | -5.66   | 353  | 42.21 | -3.01  | Sensitive |
| PDXK            | -40.95  | -37.49  | 233  | 77.68 | -2.80  | Sensitive |
| PDZD2*          | -61.87  | -31.87  | 375  | 56.80 | -5.51  | Sensitive |
|                 | -128.2  | -50.25  | 438  | 58.45 |        |           |
| PEG10           | -144.24 | -63.78  | 529  | 58.98 | -4.72  | Sensitive |
| PIGC*           | -45.77  | -10.59  | 384  | 51.30 | -2.51  | Sensitive |
|                 | -36.83  | -4.14   | 331  | 50.76 |        |           |
|                 | -161.33 | -60.46  | 1514 | 45.51 |        |           |
| PIGN*           | -36.89  | -17.93  | 498  | 46.59 | -2.35  | Sensitive |
|                 | -51.82  | -22.52  | 421  | 47.98 |        |           |
| PIK3CA          | -60.2   | -10.75  | 207  | 56.04 | -3.61  | Sensitive |
| PIK3R3*         | -176.41 | -81.28  | 740  | 54.73 | -4.30  | Sensitive |
|                 | -46.17  | -21.05  | 307  | 61.24 |        |           |
|                 | -31.59  | -8.89   | 150  | 66.67 |        |           |
| PITPNA          | -79.87  | -57.98  | 306  | 80.39 | -4.20  | Sensitive |
| PLEKHA4         | -60.95  | -27.23  | 601  | 52.91 | -65.86 | Sensitive |
| PLXNA2          | -228.56 | -62.77  | 808  | 67.33 | -6.01  | Sensitive |
| PNMA2           | -164.9  | -67.44  | 945  | 57.99 | -3.94  | Sensitive |
| PPP1CC          | -61.13  | -27.07  | 241  | 66.80 | -4.83  | Sensitive |
| PPP1R3D         | -91.6   | -57.58  | 416  | 62.98 | -6.01  | Sensitive |
| PPP2R5A*        | -189.58 | -59.14  | 624  | 76.44 | -3.73  | Sensitive |
|                 | -124.56 | -92.96  | 439  | 75.40 |        |           |
| PPP2R5B*        | -193.17 | -100.45 | 672  | 70.54 | -3.17  | Sensitive |
|                 | -160    | -69.36  | 646  | 69.20 |        |           |
| PPP4C*          | -64.99  | -39.51  | 218  | 75.69 | -3.39  | Sensitive |
|                 | -77.31  | -49.59  | 203  | 72.41 |        |           |
| PPP6R1 (SAPS1)  | -101.42 | -24.91  | 292  | 78.42 | -3.05  | Sensitive |

|         |         |         |      |       |       |           |
|---------|---------|---------|------|-------|-------|-----------|
| PRMT2*  | -235.33 | -101.45 | 812  | 61.58 | -2.84 | Sensitive |
|         | -69.2   | -45.84  | 255  | 58.82 |       |           |
|         | -175.74 | -56.77  | 1004 | 57.27 |       |           |
| PSEN2   | -132.68 | -23.96  | 486  | 57.41 | -2.12 | Sensitive |
| PSME3   | -91.42  | -47.26  | 276  | 69.57 | -2.70 | Sensitive |
| PTER*   | -15.5   | -0.67   | 103  | 38.83 | -4.23 | Sensitive |
|         | -28.39  | -11.31  | 228  | 46.49 |       |           |
|         | -20.7   | -11.08  | 174  | 48.85 |       |           |
|         | -43.64  | -23.68  | 296  | 52.70 |       |           |
| PTPN11  | -76.78  | -53.83  | 248  | 77.42 | -3.94 | Sensitive |
| PTPN21* | -22.56  | -2.09   | 255  | 58.43 | -4.45 | Sensitive |
|         | -82.93  | -44.02  | 335  | 65.37 |       |           |
| PTPN9   | -185.39 | -91.3   | 563  | 68.21 | -2.37 | Sensitive |
| PUM2*   | 0       | 0       | 73   | 39.73 | -4.29 | Sensitive |
|         | -31.43  | -11.02  | 174  | 60.92 |       |           |
| QKI     | -148.71 | -91.81  | 601  | 79.03 | -6.58 | Sensitive |
| RAB10   | -68.64  | -40.66  | 549  | 68.31 | -4.27 | Sensitive |
| RAB24*  | -140.14 | -50.22  | 470  | 70.43 | -2.55 | Sensitive |
|         | -77.95  | -13.16  | 382  | 70.16 |       |           |
| RAB27A* | -55.19  | -23.82  | 280  | 50.00 | -2.74 | Sensitive |
|         | -47.68  | -19.83  | 302  | 36.42 |       |           |
|         | -23.7   | -9.39   | 243  | 39.51 |       |           |
|         | -43.1   | -22.95  | 283  | 39.22 |       |           |
| RAB9B   | -65.43  | -29.56  | 335  | 52.24 | -3.95 | Sensitive |
| RAD17*  | -140.85 | -92.8   | 728  | 47.25 | -8.76 | Sensitive |
|         | 0       | 0       | 112  | 32.14 |       |           |
| RAD51   | -48.36  | -33.37  | 318  | 65.09 | -3.19 | Sensitive |
| RANBP1  | -17.52  | -10.89  | 152  | 80.26 | -1.85 | Sensitive |
| RBBP7   | -126.06 | -63.14  | 411  | 68.86 | -4.90 | Sensitive |
| RFX5*   | -45.9   | -23.23  | 229  | 51.97 | -2.78 | Sensitive |
|         | -36.25  | -25.9   | 301  | 51.50 |       |           |
|         | -43.95  | -28.99  | 328  | 52.74 |       |           |
| RNF10*  | -115.2  | -41.83  | 511  | 72.41 | -3.19 | Sensitive |
|         | -114.69 | -32.77  | 459  | 71.24 |       |           |
| RNF4*   | -101.82 | -25.05  | 529  | 51.80 | -7.41 | Sensitive |
|         | -315.94 | -154.97 | 1565 | 45.37 |       |           |
|         | -219.96 | -106.66 | 920  | 56.74 |       |           |
| ROCK1   | -313.52 | -156.76 | 991  | 67.51 | -4.67 | Sensitive |
| RTN4IP1 | -42.76  | -47.48  | 516  | 50.00 | -4.91 | Sensitive |
| SAMD12  | -49.87  | -30.77  | 187  | 55.61 | -6.78 | Sensitive |
| SAMD4B  | -176.67 | -88.17  | 1085 | 55.39 | -4.02 | Sensitive |
| SAMD9L* | -215.78 | -90.09  | 1267 | 42.54 | -3.76 | Sensitive |
|         | -156.56 | -44.55  | 868  | 45.16 |       |           |
|         | -93.99  | -34     | 672  | 43.30 |       |           |
| SCYL2   | -130.8  | -76.36  | 487  | 64.89 | -4.81 | Sensitive |
| SDC1*   | -66.19  | -14.15  | 295  | 73.22 | -2.60 | Sensitive |
|         | -98.95  | -63.82  | 441  | 75.06 |       |           |

|          |         |         |      |       |         |           |
|----------|---------|---------|------|-------|---------|-----------|
| SDC2*    | -296.21 | -106.42 | 971  | 63.34 | -2.29   | Sensitive |
|          | -132.99 | -69.25  | 469  | 65.03 |         |           |
| SENP3    | -62.79  | -16.97  | 370  | 72.16 | -2.98   | Sensitive |
| SET      | -123.74 | -61.97  | 407  | 76.41 | -4.52   | Sensitive |
| SETD3    | -80.9   | -36.14  | 210  | 69.52 | -3.94   | Sensitive |
| SEZ6L2   | -122.59 | -43.96  | 578  | 62.11 | -2.79   | Sensitive |
| SGMS1    | -119.11 | -89.36  | 1010 | 53.56 | -3.36   | Sensitive |
| SGMS2*   | -31.2   | -14.08  | 439  | 37.81 | -3.46   | Sensitive |
|          | -89.88  | -34.02  | 607  | 49.26 |         |           |
|          | -99.06  | -57.11  | 679  | 41.83 |         |           |
| SH2D5    | -123.38 | -70.04  | 448  | 72.54 | -2.29   | Sensitive |
| SH3BP5L  | -312.79 | -153.71 | 1280 | 57.89 | -4.18   | Sensitive |
| SHB      | -187.44 | -118.81 | 616  | 75.32 | -3.81   | Sensitive |
| SIPA1L1  | -38.65  | -9.8    | 398  | 38.19 | -5.04   | Sensitive |
| SLC41A1  | -330.32 | -145.9  | 1065 | 60.85 | -3.53   | Sensitive |
| SLC45A3  | -103.84 | -10.69  | 346  | 66.47 | -2.22   | Sensitive |
| SLIT2    | -117.34 | -57.74  | 302  | 62.25 | -2.92   | Sensitive |
| SMAD3*   | -128.4  | -64.27  | 360  | 78.33 | -3.10   | Sensitive |
|          | -83.88  | -48.37  | 273  | 75.82 |         |           |
| SMAP2    | -187.01 | -107.95 | 474  | 73.42 | -2.22   | Sensitive |
| SMARCD3  | -172.51 | -107.67 | 461  | 68.98 | -4.20   | Sensitive |
| SMEK2    | -93.29  | -63.28  | 378  | 63.76 | -6.01   | Sensitive |
| SMURF2   | -125.4  | -30.37  | 238  | 80.25 | -6.70   | Sensitive |
| SNX33    | -299.23 | -188.56 | 1247 | 59.90 | -6.06   | Sensitive |
| SOX4*    | -126.5  | -71.7   | 844  | 56.28 | -5.30   | Sensitive |
|          | -58.34  | -20.68  | 664  | 54.22 |         |           |
| SPHK1    | -185.2  | -105.37 | 547  | 71.85 | no data | Sensitive |
| SPIN1*   | -36.8   | -38.92  | 328  | 56.10 | -3.79   | Sensitive |
|          | -137.2  | -25.62  | 706  | 50.85 |         |           |
| SPTBN2*  | -14.35  | -9.61   | 122  | 61.48 | no data | Sensitive |
|          | -14.35  | -9.61   | 122  | 61.48 |         |           |
|          | -29.66  | -24.17  | 382  | 60.73 |         |           |
|          | -29.66  | -24.17  | 382  | 60.73 |         |           |
| SRC*     | -21.77  | -7.85   | 152  | 63.16 | -2.44   | Sensitive |
|          | -126.4  | -51.19  | 399  | 65.41 |         |           |
|          | -22.4   | -8.77   | 89   | 57.30 |         |           |
|          | -150.33 | -67.68  | 503  | 59.24 |         |           |
| ST3GAL1* | -202.98 | -114.63 | 1078 | 52.04 | -3.25   | Sensitive |
|          | -13.52  | -30.95  | 427  | 50.35 |         |           |
|          | -177.82 | -96.6   | 1067 | 52.11 |         |           |
|          | -128.66 | -59.94  | 788  | 51.40 |         |           |
| STAT6*   | -65.1   | -46.09  | 376  | 56.12 | -2.45   | Sensitive |
|          | -64.4   | -39.34  | 336  | 56.55 |         |           |
|          | -48.02  | -16.86  | 199  | 64.82 |         |           |
|          | -58.4   | -29.25  | 301  | 57.14 |         |           |
| STK11    | -404.13 | -207.7  | 1165 | 73.99 | -4.46   | Sensitive |
| STXBP5   | -51.91  | -13.24  | 158  | 70.89 | -4.87   | Sensitive |

|                 |         |         |      |       |       |           |
|-----------------|---------|---------|------|-------|-------|-----------|
| SYTL4*          | -48     | -1.32   | 238  | 51.68 | -6.05 | Sensitive |
|                 | -57.61  | -28.16  | 237  | 51.48 |       |           |
|                 | -82.1   | -39.03  | 397  | 45.84 |       |           |
|                 | -45.81  | -7.16   | 382  | 49.48 |       |           |
| AB3 (MAP3K7IP3) | -76.53  | -15.18  | 597  | 43.55 | -4.38 | Sensitive |
|                 | -16.57  | -9.82   | 182  | 39.01 |       |           |
|                 | -35.01  | -16.59  | 228  | 45.18 |       |           |
| TAF4B           | -238.03 | -46.91  | 1048 | 61.74 | -3.83 | Sensitive |
| TAF6*           | -133.85 | -56.58  | 576  | 60.94 | -2.86 | Sensitive |
|                 | -117.6  | -60.41  | 304  | 64.80 |       |           |
|                 | -45.9   | -5.71   | 145  | 64.14 |       |           |
| TAF7            | -96.22  | -52.69  | 769  | 49.02 | -4.42 | Sensitive |
| TAOK1           | -133.01 | -56.62  | 569  | 68.19 | -8.31 | Sensitive |
| TAOK2           | -385.55 | -212.64 | 1093 | 66.15 | -4.73 | Sensitive |
| TATDN2*         | -212.41 | -91.84  | 1101 | 62.49 | -2.30 | Sensitive |
|                 | -19.75  | -3.6    | 212  | 53.77 |       |           |
| TBC1D5*         | -238.88 | -122.18 | 1715 | 42.74 | -7.47 | Sensitive |
|                 | -6.28   | 3.76    | 227  | 50.22 |       |           |
| TBC1D8B         | -12.91  | -4.18   | 224  | 57.14 | -3.13 | Sensitive |
| TBL1X*          | -153.64 | -143.29 | 690  | 72.90 | -2.41 | Sensitive |
|                 | -63.32  | -37.97  | 418  | 54.07 |       |           |
| TCEAL8*         | -18.1   | -10.25  | 196  | 41.33 | -4.33 | Sensitive |
|                 | -33.45  | -14.03  | 287  | 44.25 |       |           |
| TCF12*          | -65.03  | -27.15  | 285  | 65.26 | -5.16 | Sensitive |
|                 | -81.44  | -37.24  | 346  | 66.18 |       |           |
| TEAD1*          | -38.65  | -32.25  | 204  | 52.94 | -4.81 | Sensitive |
|                 | -101.83 | -68.39  | 501  | 64.87 |       |           |
| TFPT            | -75.38  | -44.47  | 456  | 57.46 | -2.79 | Sensitive |
| TGFB1           | -244.93 | -117.73 | 932  | 71.78 | -2.12 | Sensitive |
| TIMM21          | -19.7   | -8.86   | 348  | 47.41 | -4.70 | Sensitive |
| TLE1            | -340.85 | -132.35 | 1115 | 70.22 | -8.78 | Sensitive |
| TMEM184C        | -94.37  | -57.84  | 624  | 56.73 | -4.20 | Sensitive |
| TMEM56          | -63.28  | -30.47  | 341  | 69.79 | -2.89 | Sensitive |
| TMEM65          | -161.32 | -109.84 | 585  | 72.99 | -5.35 | Sensitive |
| TMEM99          | -50.27  | -23.14  | 354  | 49.72 | -2.89 | Sensitive |
| TOR1AIP2_001    | -78.06  | -41.11  | 438  | 50.46 | -4.69 | Sensitive |
| TOR1AIP2_002    | -78.06  | -41.11  | 438  | 50.46 | -2.60 | Sensitive |
| TPX2            | -62.05  | -32.9   | 578  | 53.98 | -5.13 | Sensitive |
| TRAF3*          | -70.2   | -34.27  | 325  | 62.77 | -3.48 | Sensitive |
|                 | -76.86  | -41.98  | 267  | 74.53 |       |           |
| TRIM37          | -141.25 | -58.84  | 510  | 68.04 | -3.27 | Sensitive |
| TRIM44          | -104.97 | -56.59  | 357  | 76.47 | -4.19 | Sensitive |
| TRIM8           | -78.9   | -37.04  | 173  | 74.57 | -3.03 | Sensitive |
| TRMT2B*         | -123.46 | -66.45  | 417  | 61.87 | -2.89 | Sensitive |
|                 | -269.84 | -76.35  | 823  | 59.05 |       |           |
|                 | -66.07  | -26.36  | 406  | 58.87 |       |           |
| TSC22D4         | -248.84 | -73.19  | 805  | 66.96 | -5.91 | Sensitive |



|          |         |         |      |       |       |           |
|----------|---------|---------|------|-------|-------|-----------|
| TTLL5    | -37.23  | -6.93   | 255  | 59.22 | -4.42 | Sensitive |
| TYK2     | -166.67 | -60     | 532  | 60.53 | -2.77 | Sensitive |
| UBASH3B  | -192.8  | -95.19  | 425  | 67.76 | -2.64 | Sensitive |
| UBE2D2*  | -14.7   | -9.33   | 116  | 75.00 | -3.89 | Sensitive |
|          | -88.49  | -47.42  | 676  | 74.56 |       |           |
| UBE2E3*  | -110.2  | -50.5   | 268  | 72.39 | -2.26 | Sensitive |
|          | -67.53  | -38.52  | 434  | 68.66 |       |           |
| UBE2H*   | -152.9  | -96.6   | 444  | 75.45 | -4.32 | Sensitive |
|          | -152.9  | -96.6   | 444  | 75.45 |       |           |
| UBE2M    | -229.05 | -100.24 | 645  | 76.28 | -2.55 | Sensitive |
| UBE4B    | -30.31  | -10.8   | 125  | 56.00 | -2.85 | Sensitive |
| UBL3     | -312.42 | -184.48 | 1196 | 63.46 | -8.35 | Sensitive |
| UBQLN2   | -111.91 | -20.73  | 331  | 73.11 | -3.25 | Sensitive |
| UCP2     | -67     | -45.86  | 893  | 62.04 | -3.39 | Sensitive |
| USP9X    | -157.16 | -75.5   | 683  | 62.08 | -4.27 | Sensitive |
| VANGL1*  | -62.3   | -37.28  | 265  | 49.43 | -2.26 | Sensitive |
|          | -48.6   | -36.89  | 321  | 57.63 |       |           |
|          | -6.8    | -0.27   | 62   | 38.71 |       |           |
| VEPH1*   | -72.41  | -17.07  | 367  | 48.50 | -6.68 | Sensitive |
|          | -53.26  | -15.41  | 358  | 46.93 |       |           |
| WDR12    | -119.17 | -46.91  | 800  | 46.38 | -2.65 | Sensitive |
| WDR24    | -153.55 | -81.65  | 810  | 63.70 | -3.97 | Sensitive |
| WDTC1    | -92.21  | -36.22  | 433  | 63.28 | -4.23 | Sensitive |
| WHSC1L1  | -193.12 | -87.62  | 568  | 69.19 | -4.85 | Sensitive |
| WLS      | -84.42  | -40.05  | 304  | 58.22 | -1.63 | Sensitive |
| WNK1     | -245.3  | -51.88  | 693  | 75.90 | -5.09 | Sensitive |
| WNK3     | -42.46  | -50.58  | 489  | 56.24 | -4.85 | Sensitive |
| WWC1     | -0.76   | 0       | 53   | 77.36 | -3.09 | Sensitive |
| XPO1*    | -57.61  | -15.17  | 193  | 57.51 | -8.06 | Sensitive |
|          | -121.82 | -125.15 | 778  | 59.25 |       |           |
|          | -74.11  | -49.04  | 457  | 52.30 |       |           |
| XPO6     | -188.24 | -118.5  | 551  | 72.05 | -4.14 | Sensitive |
| XRCC3*   | -36.7   | -34.67  | 391  | 54.73 | -4.11 | Sensitive |
|          | -68.92  | -38.56  | 451  | 59.20 |       |           |
|          | -36.2   | -15.74  | 359  | 52.92 |       |           |
|          | -55.1   | -18.26  | 413  | 56.17 |       |           |
|          | -209.42 | -107.45 | 847  | 58.32 |       |           |
| XRRA1    | -80.61  | -45.59  | 382  | 59.95 | -2.93 | Sensitive |
| YAP1     | -185.39 | -78.18  | 438  | 73.06 | -6.07 | Sensitive |
| YWHAH    | -35.19  | -6.02   | 323  | 79.57 | -3.63 | Sensitive |
| ZDHC5    | -228.8  | -157.35 | 1412 | 49.93 | -4.42 | Sensitive |
| ZFP91    | -68.91  | -25.46  | 221  | 76.92 | -4.41 | Sensitive |
| ZFYVE1   | -117.21 | -70.65  | 771  | 51.49 | -3.98 | Sensitive |
| ZFYVE20* | -147.7  | -50.12  | 664  | 51.51 | -3.42 | Sensitive |
|          | -141    | -71.4   | 523  | 53.92 |       |           |
| ZHX1*    | -68.01  | -53.79  | 575  | 49.91 | -4.98 | Sensitive |
|          | -84.9   | -37.59  | 668  | 54.34 |       |           |

|          |         |         |      |        |        |             |
|----------|---------|---------|------|--------|--------|-------------|
|          | -101.27 | -45.29  | 591  | 46.19  |        |             |
| ZHX3*    | -10.62  | -14.41  | 428  | 44.39  | -4.82  | Sensitive   |
|          | -19.48  | -22.57  | 410  | 43.90  |        |             |
|          | -59.99  | -7.04   | 399  | 54.14  |        |             |
|          | -79.62  | -43.82  | 955  | 45.65  |        |             |
| ZMAT3    | -264.53 | -146.24 | 792  | 65.03  | -1.84  | Sensitive   |
| ZNF45    | -187.17 | -89.68  | 1141 | 51.80  | -8.19  | Sensitive   |
| ZNF521*  | -46.61  | -25.96  | 248  | 51.61  | -4.13  | Sensitive   |
|          | -56.4   | -31.41  | 199  | 54.77  |        |             |
| ZNF528   | -54.4   | -14.66  | 476  | 45.59  | -4.50  | Sensitive   |
| ZNF664*  | -173.58 | -64.51  | 999  | 49.65  | -14.59 | Sensitive   |
|          | -469.85 | -209.05 | 1880 | 59.89  |        |             |
|          | -160.92 | -65.16  | 1076 | 51.67  |        |             |
|          | -147.72 | -82.64  | 1030 | 50.58  |        |             |
| ZNF672   | -199.69 | -95.06  | 796  | 63.07  | -4.05  | Sensitive   |
| ZNF740   | -104.56 | -28.54  | 495  | 53.33  | -4.40  | Sensitive   |
| ACACA    | -63.5   | -15.73  | 482  | 62.03  | 1.12   | Insensitive |
| ACIN1    | -50.6   | -21.62  | 328  | 54.57  | -1.16  | Insensitive |
| ACSS3    | -153.73 | -77.81  | 910  | 51.10  | 1.08   | Insensitive |
| ADAMTSL1 | -33.42  | -17.58  | 339  | 53.69  | 1.20   | Insensitive |
| ADAT3    | -36.17  | -14.71  | 268  | 69.40  | -1.10  | Insensitive |
| AKAP10   | -69.82  | -25.79  | 158  | 67.72  | -1.17  | Insensitive |
| AKIRIN1  | -19.15  | -18.78  | 158  | 74.68  | 1.16   | Insensitive |
| ALDH6A1  | -18.73  | -4.75   | 99   | 68.69  | 1.19   | Insensitive |
| AMDHD2   | -1.9    | -2.05   | 69   | 75.36  | 1.16   | Insensitive |
| AMMECR1  | -69.95  | -44.31  | 168  | 78.57  | -1.14  | Insensitive |
| ANAPC7   | 0       | 0       | 1    | 100.00 | 1.04   | Insensitive |
| ANKRD44  | -55.36  | -25.18  | 183  | 66.12  | 1.14   | Insensitive |
| ANKRD52  | -59.9   | -30.84  | 122  | 83.61  | 1.06   | Insensitive |
| ANXA7    | -16.1   | 0       | 57   | 68.42  | 1.00   | Insensitive |
| AP1S3    | -30.34  | -9.23   | 132  | 71.21  | -1.02  | Insensitive |
| AP5Z1    | -24.9   | -7.46   | 94   | 70.21  | 1.15   | Insensitive |
| ARHGAP17 | -14.2   | -9.07   | 70   | 84.29  | -1.01  | Insensitive |
| ARRDC2   | -26     | -12.6   | 143  | 65.73  | 1.04   | Insensitive |
| ASB8     | -16.81  | -5.33   | 170  | 58.24  | -1.09  | Insensitive |
| ATP6V0A2 | -73.28  | -51.62  | 248  | 79.84  | 1.06   | Insensitive |
| ATPAF1   | -30.21  | -8.49   | 105  | 84.76  | 1.04   | Insensitive |
| AVEN     | -18.7   | -9.85   | 130  | 80.00  | -1.08  | Insensitive |
| BBS2     | -87.61  | -38.38  | 421  | 66.51  | -1.05  | Insensitive |
| BCAR1    | -27.16  | 0       | 127  | 85.83  | -1.07  | Insensitive |
| BCKDHB   | -7.7    | -7.53   | 47   | 70.21  | 1.17   | Insensitive |
| BFSP1    | -14.82  | -9.82   | 40   | 90.00  | 1.16   | Insensitive |
| BNIP3L   | -77.5   | -33.92  | 233  | 70.82  | 1.07   | Insensitive |
| BOD1     | -19.61  | -17.74  | 224  | 68.75  | 1.01   | Insensitive |
| BRE      | -38.8   | -8.61   | 138  | 63.04  | 1.06   | Insensitive |
| BTRC     | -25.28  | -14.59  | 118  | 72.03  | -1.00  | Insensitive |
| C11orf1  | -56.77  | -23.7   | 337  | 55.49  | -1.04  | Insensitive |

|          |         |        |     |       |       |             |
|----------|---------|--------|-----|-------|-------|-------------|
| C15orf61 | -88.02  | -24.31 | 181 | 83.43 | 1.16  | Insensitive |
| C19orf12 | -12.4   | -20.73 | 127 | 66.93 | 1.11  | Insensitive |
| C9orf156 | -3.5    | -3.08  | 77  | 62.34 | 1.19  | Insensitive |
| CARKD    | 0       | 0      | 14  | 71.43 | -1.03 | Insensitive |
| CARS2    | -19.1   | -4.07  | 64  | 75.00 | 1.12  | Insensitive |
| CASP2    | -106.3  | -51.27 | 241 | 72.20 | 1.08  | Insensitive |
| CASP6    | -34.47  | -17.9  | 78  | 71.79 | -1.13 | Insensitive |
| CAT      | -19.6   | -8.82  | 89  | 62.92 | 1.14  | Insensitive |
| CCDC137  | -98.85  | -15.39 | 403 | 73.95 | -1.11 | Insensitive |
| CCDC6    | -74.5   | -9.31  | 232 | 71.98 | 1.09  | Insensitive |
| CCDC71   | -40.8   | -18.08 | 107 | 70.09 | 1.16  | Insensitive |
| CCDC75   | -17.8   | -4.54  | 145 | 60.00 | -1.06 | Insensitive |
| CCDC90A  | -17.77  | -7.63  | 139 | 75.54 | 1.15  | Insensitive |
| CCDC94   | -4.1    | -5.37  | 68  | 48.53 | 1.15  | Insensitive |
| CCNO     | -60.4   | -33.16 | 157 | 68.15 | 1.01  | Insensitive |
| CDK2AP2  | -177.94 | -73.41 | 549 | 71.58 | 1.15  | Insensitive |
| CDK5RAP1 | -59     | -29.71 | 154 | 63.64 | -1.01 | Insensitive |
| CDKAL1   | -6.71   | -3.21  | 167 | 44.31 | -1.10 | Insensitive |
| CEP72    | -17.45  | -6.94  | 90  | 74.44 | -1.18 | Insensitive |
| CEP85    | 2.44    | 0      | 131 | 59.54 | 1.01  | Insensitive |
| CHAC1    | -88.52  | -30.73 | 309 | 68.61 | 1.07  | Insensitive |
| CHCHD1   | 0       | -0.48  | 13  | 61.54 | 1.03  | Insensitive |
| CIZ1     | -34.71  | 0.52   | 163 | 79.75 | 1.05  | Insensitive |
| CLMN     | -59.8   | -35.43 | 114 | 85.09 | 1.04  | Insensitive |
| CTNNBL1  | -34.6   | -24.99 | 117 | 68.38 | -1.02 | Insensitive |
| CUL4A    | -54.56  | -41.87 | 249 | 66.67 | -1.08 | Insensitive |
| CUL4B    | -74.76  | -20.7  | 402 | 46.52 | -1.08 | Insensitive |
| CWF19L1  | -22.61  | -10.92 | 87  | 54.02 | 1.01  | Insensitive |
| CYTH2    | -121.73 | -46.48 | 300 | 66.67 | 1.17  | Insensitive |
| DCAF10   | -119.31 | -30.69 | 365 | 67.67 | -1.03 | Insensitive |
| DCAF15   | 0       | 0      | 21  | 57.14 | -1.01 | Insensitive |
| DCP1B    | -7.3    | -5.73  | 80  | 60.00 | 1.07  | Insensitive |
| DCTN1    | -99.89  | -54.79 | 318 | 61.32 | 1.05  | Insensitive |
| DDB2     | -31.38  | -17.9  | 195 | 60.51 | 1.08  | Insensitive |
| DDIT4    | -26.81  | -28.45 | 201 | 65.67 | 1.10  | Insensitive |
| DDX24    | -18.13  | -15.44 | 132 | 65.15 | 1.13  | Insensitive |
| DDX47    | 0       | 0      | 22  | 54.55 | -1.03 | Insensitive |
| DERA     | -82.6   | -7.65  | 212 | 73.58 | 1.17  | Insensitive |
| DHTKD1   | -18.7   | -8.22  | 62  | 69.35 | 1.02  | Insensitive |
| DHX15    | -26.15  | -9.19  | 157 | 59.87 | -1.09 | Insensitive |
| DHX30    | -129.4  | -83.85 | 407 | 66.58 | 1.04  | Insensitive |
| DHX40    | -20.35  | -9.59  | 147 | 63.27 | -1.01 | Insensitive |
| DIS3L    | -16.8   | -9.66  | 50  | 84.00 | -1.16 | Insensitive |
| DMAP1    | -3.46   | -0.23  | 78  | 73.08 | 1.12  | Insensitive |
| DNAJB2   | -48.34  | -41.45 | 288 | 74.65 | 1.11  | Insensitive |
| DOCK2    | -18.86  | -9.8   | 80  | 77.50 | 1.18  | Insensitive |
| DOCK7    | 0       | 0      | 18  | 83.33 | 1.00  | Insensitive |

|           |         |        |     |       |       |             |
|-----------|---------|--------|-----|-------|-------|-------------|
| DPY19L3   | -63.7   | -22.53 | 215 | 66.51 | 1.03  | Insensitive |
| DSP       | -23.8   | -21.18 | 341 | 73.61 | -1.18 | Insensitive |
| DTD1      | -31.07  | -24.64 | 180 | 77.22 | 1.02  | Insensitive |
| ECI2      | 0       | 0      | 37  | 78.38 | -1.05 | Insensitive |
| EDC4      | -51.1   | -28.48 | 239 | 74.90 | 1.01  | Insensitive |
| EDF1      | -5.4    | 2.78   | 28  | 78.57 | 1.14  | Insensitive |
| EHHADH    | -15.4   | -2.57  | 76  | 65.79 | -1.06 | Insensitive |
| ELP3      | -68.61  | -17.76 | 377 | 57.82 | 1.07  | Insensitive |
| ELP4      | -4.44   | -1.51  | 35  | 45.71 | 1.09  | Insensitive |
| ERCC8     | -6.7    | -1.83  | 43  | 62.79 | -1.08 | Insensitive |
| FAM120B   | 1.34    | 3.18   | 108 | 66.67 | 1.06  | Insensitive |
| FAM63B    | -28.4   | -20.37 | 82  | 68.29 | 1.12  | Insensitive |
| FIG4      | -27.3   | -16.32 | 124 | 65.32 | 1.13  | Insensitive |
| GABARAPL2 | -9.2    | 0      | 136 | 75.00 | 1.18  | Insensitive |
| GDI2      | -51.62  | -39.58 | 291 | 69.76 | 1.03  | Insensitive |
| GID4      | -41.7   | -27.14 | 173 | 65.32 | 1.16  | Insensitive |
| GINS3     | -30.17  | -27.72 | 208 | 60.10 | 1.10  | Insensitive |
| GLIPR1    | -32.66  | -8.8   | 201 | 49.75 | 1.14  | Insensitive |
| GLYR1     | -22.1   | -12.53 | 77  | 74.03 | 1.08  | Insensitive |
| GMPPB     | -95.9   | -44.4  | 225 | 73.78 | 1.02  | Insensitive |
| GNB5      | -9.6    | -6.49  | 66  | 51.52 | 1.20  | Insensitive |
| GOLGA2    | 0       | 0      | 13  | 76.92 | 1.05  | Insensitive |
| GPD1L     | -67.65  | -35.34 | 201 | 76.12 | -1.08 | Insensitive |
| GPKOW     | -18.87  | -11.66 | 79  | 58.23 | 1.02  | Insensitive |
| GPR126    | -65.65  | -11.22 | 401 | 69.08 | 1.06  | Insensitive |
| HARS2     | -42.9   | -19.86 | 223 | 61.43 | 1.02  | Insensitive |
| HEATR5A   | -19.51  | -20.74 | 185 | 53.51 | 1.19  | Insensitive |
| HES4      | -53.96  | -0.84  | 138 | 84.06 | 1.09  | Insensitive |
| HIF1AN    | -5.7    | -8.48  | 100 | 56.00 | 1.11  | Insensitive |
| HIST1H2AA | -9.4    | -6.39  | 35  | 51.43 | 1.04  | Insensitive |
| HSBP1L1   | -28.61  | -18.5  | 175 | 78.86 | 1.10  | Insensitive |
| HTT       | -55.2   | -22.27 | 145 | 73.10 | 1.08  | Insensitive |
| IDH3A     | -19.3   | 0      | 83  | 75.90 | -1.11 | Insensitive |
| IFT172    | -31.5   | -20.88 | 104 | 60.58 | 1.07  | Insensitive |
| ILF2      | -14.11  | -10.21 | 126 | 59.52 | 1.01  | Insensitive |
| INTS2     | -19.21  | -13.09 | 76  | 63.16 | -1.03 | Insensitive |
| ITPKC     | -10.1   | -5.34  | 33  | 75.76 | 1.02  | Insensitive |
| KANSL3    | -16.4   | -9.77  | 77  | 63.64 | 1.11  | Insensitive |
| KAT5      | -59.92  | -42.95 | 234 | 65.81 | 1.07  | Insensitive |
| KBTBD4    | -8.1    | 0      | 64  | 67.19 | -1.01 | Insensitive |
| KDM4C     | -142.8  | -73.42 | 565 | 64.96 | -1.12 | Insensitive |
| KDM8      | 0.41    | -1.74  | 118 | 59.32 | -1.04 | Insensitive |
| KIAA1109  | 0       | 0      | 45  | 31.11 | 1.07  | Insensitive |
| KIAA1328  | 0       | -1.22  | 22  | 59.09 | 1.18  | Insensitive |
| KIAA1549  | -16.2   | -10.39 | 49  | 85.71 | -1.02 | Insensitive |
| KLHL5     | -27.35  | -18.84 | 283 | 39.22 | -1.02 | Insensitive |
| KRBA1     | -166.59 | -68.22 | 399 | 66.17 | -1.19 | Insensitive |

|          |         |         |     |       |       |             |
|----------|---------|---------|-----|-------|-------|-------------|
| LEMD3    | 0       | 0       | 26  | 42.31 | 1.06  | Insensitive |
| LGALS3   | -106.4  | -69.81  | 261 | 78.16 | 1.10  | Insensitive |
| LIMS2    | -25.48  | -15.7   | 158 | 77.85 | 1.10  | Insensitive |
| LIPE     | -31.16  | -10.46  | 277 | 49.46 | -1.01 | Insensitive |
| LRIG3    | -58.12  | -28.45  | 287 | 64.46 | -1.06 | Insensitive |
| LTA4H    | 0       | 2.51    | 142 | 57.75 | 1.10  | Insensitive |
| MAN2C1   | -11.1   | -6.76   | 47  | 70.21 | -1.12 | Insensitive |
| MAP2K4   | -24.7   | -11.82  | 63  | 69.84 | 1.18  | Insensitive |
| MAP3K12  | -39.07  | -9.52   | 226 | 69.47 | -1.12 | Insensitive |
| MAVS     | -18.47  | -27.97  | 128 | 67.97 | 1.00  | Insensitive |
| MBLAC2   | -102.59 | -39.78  | 476 | 69.54 | 1.13  | Insensitive |
| MCCC2    | -35.68  | -3.67   | 129 | 68.22 | 1.00  | Insensitive |
| MCM4     | -89.72  | -22.8   | 209 | 73.68 | 1.04  | Insensitive |
| MCM6     | -6.23   | 0       | 61  | 57.38 | 1.01  | Insensitive |
| MED19    | 0       | -2.05   | 22  | 81.82 | 1.18  | Insensitive |
| METAP1   | -33.59  | -14.04  | 134 | 76.87 | -1.04 | Insensitive |
| MLXIP    | -24.71  | -1.67   | 132 | 84.09 | 1.13  | Insensitive |
| MPLKIP   | -11.7   | -6.97   | 92  | 57.61 | 1.10  | Insensitive |
| MRPL19   | 2.4     | -0.18   | 25  | 56.00 | -1.03 | Insensitive |
| MRPL46   | -7.3    | -2.08   | 42  | 61.90 | 1.08  | Insensitive |
| MRPS28   | 0       | 0       | 23  | 43.48 | 1.10  | Insensitive |
| MRPS5    | -96.3   | -43.46  | 209 | 75.12 | 1.14  | Insensitive |
| MSN      | -30.2   | -5.06   | 172 | 61.63 | -1.08 | Insensitive |
| MSRA     | -40.86  | -32.24  | 249 | 78.31 | 1.11  | Insensitive |
| MTA1     | -46.1   | -5.7    | 214 | 85.05 | 1.06  | Insensitive |
| MTA3     | -65.8   | -13.39  | 229 | 79.04 | 1.12  | Insensitive |
| MTG1     | -14.15  | -5.17   | 50  | 76.00 | 1.15  | Insensitive |
| MTHFD1   | -132.07 | -60.64  | 387 | 59.69 | -1.15 | Insensitive |
| MTRR     | 0       | 0       | 30  | 56.67 | 1.06  | Insensitive |
| MUM1     | -22.13  | -11.67  | 101 | 64.36 | -1.07 | Insensitive |
| MUS81    | -105.16 | -35.75  | 349 | 67.91 | -1.09 | Insensitive |
| MUTYH    | -45.7   | -15.15  | 111 | 72.07 | 1.03  | Insensitive |
| MYO18A   | -64.57  | -28.11  | 181 | 68.51 | 1.16  | Insensitive |
| N6AMT1   | -0.9    | 0       | 26  | 61.54 | 1.19  | Insensitive |
| NAA40    | -15.43  | -10.97  | 101 | 69.31 | -1.00 | Insensitive |
| NBR1     | -15.2   | 0       | 83  | 73.49 | 1.11  | Insensitive |
| NDNL2    | -35.75  | -22.57  | 124 | 74.19 | 1.01  | Insensitive |
| NDOR1    | -2.3    | 0       | 83  | 66.27 | -1.08 | Insensitive |
| NFATC2IP | 0       | 0       | 75  | 66.67 | -1.06 | Insensitive |
| NLN      | -71.8   | -36.05  | 178 | 79.78 | 1.01  | Insensitive |
| NOP2     | -144.97 | -70.16  | 489 | 63.80 | -1.01 | Insensitive |
| NOP56    | -118.35 | -64.75  | 516 | 73.06 | -1.02 | Insensitive |
| NPRL3    | 0.26    | -13.75  | 403 | 77.42 | 1.16  | Insensitive |
| NSFL1C   | -231    | -116.14 | 868 | 60.02 | 1.14  | Insensitive |
| NSMCE4A  | -12.4   | -6.85   | 52  | 57.69 | -1.15 | Insensitive |
| NT5C2    | -11     | -11.65  | 88  | 56.82 | 1.12  | Insensitive |
| NUB1     | -3.46   | -4.65   | 77  | 71.43 | 1.06  | Insensitive |

|         |         |        |     |       |       |             |
|---------|---------|--------|-----|-------|-------|-------------|
| NUDT21  | -35.34  | -15.36 | 173 | 65.90 | 1.11  | Insensitive |
| NUP214  | -48.65  | -23.99 | 144 | 68.75 | -1.12 | Insensitive |
| OCRL    | -50.61  | -23.78 | 165 | 75.15 | 1.06  | Insensitive |
| ODF2    | -40.97  | -14.53 | 585 | 58.63 | -1.15 | Insensitive |
| OGFOD2  | -122.31 | -55.17 | 739 | 61.57 | -1.05 | Insensitive |
| OSBP    | -68.3   | -50.79 | 480 | 63.75 | 1.04  | Insensitive |
| PABPN1  | -41.93  | -10.32 | 181 | 60.77 | 1.03  | Insensitive |
| PARP4   | -21     | -15.12 | 106 | 68.87 | 1.04  | Insensitive |
| PDCD11  | -20.59  | 0      | 94  | 64.89 | -1.15 | Insensitive |
| PDHB    | -11.9   | 1.25   | 43  | 58.14 | -1.01 | Insensitive |
| PDIA4   | -86.97  | -20.69 | 233 | 75.54 | 1.05  | Insensitive |
| PDLIM3  | -11.6   | 0      | 74  | 78.38 | 1.04  | Insensitive |
| PDLIM7  | -26.4   | -13.44 | 67  | 74.63 | 1.07  | Insensitive |
| PEAR1   | -25.91  | -13.54 | 116 | 73.28 | 1.02  | Insensitive |
| PHF13   | -103.51 | -48.43 | 382 | 75.65 | 1.14  | Insensitive |
| PHKG2   | -75.82  | -44.93 | 239 | 69.87 | 1.02  | Insensitive |
| PHLDB1  | -75.19  | -16.88 | 411 | 51.09 | -1.03 | Insensitive |
| PHLPP1  | -69.35  | -37.76 | 234 | 71.79 | -1.08 | Insensitive |
| PIK3C3  | -1.72   | 0      | 86  | 51.16 | 1.04  | Insensitive |
| PIR     | -45.57  | -20.33 | 204 | 64.71 | 1.20  | Insensitive |
| PISD    | -91.23  | -38.26 | 420 | 60.71 | 1.11  | Insensitive |
| PKNOX1  | -39.82  | -15.52 | 211 | 59.24 | -1.04 | Insensitive |
| PLOD2   | -30     | -10.99 | 178 | 78.09 | -1.02 | Insensitive |
| PLRG1   | -27.1   | -15.61 | 127 | 60.63 | -1.04 | Insensitive |
| PLSCR4  | -68.08  | -35.57 | 241 | 61.41 | 1.06  | Insensitive |
| PMM2    | -10.2   | 0.91   | 66  | 60.61 | 1.18  | Insensitive |
| POLR1A  | -11.17  | -18.47 | 379 | 46.17 | 1.03  | Insensitive |
| POLR1E  | -0.6    | 2.04   | 113 | 66.37 | 1.07  | Insensitive |
| POP5    | -8.3    | 1.32   | 36  | 75.00 | -1.03 | Insensitive |
| POU2F2  | -34.4   | -10.29 | 67  | 73.13 | 1.02  | Insensitive |
| PPAN    | 0       | -0.22  | 27  | 66.67 | 1.04  | Insensitive |
| PPP1R7* | -114.34 | -28.29 | 474 | 66.24 | 1.13  | Insensitive |
|         | -101.19 | -55.1  | 308 | 66.88 |       |             |
| PPP1R8  | -30     | -15.97 | 58  | 65.52 | 1.09  | Insensitive |
| PRIM1   | -2      | -4.36  | 37  | 59.46 | -1.10 | Insensitive |
| PRR11   | -75.58  | -42.05 | 312 | 54.17 | -1.09 | Insensitive |
| PRRC2B  | -4.5    | -1.93  | 55  | 47.27 | -1.04 | Insensitive |
| PSMA1   | -70.59  | -18.64 | 397 | 60.71 | -1.13 | Insensitive |
| PSMC5   | -49.91  | -31.58 | 308 | 54.22 | -1.16 | Insensitive |
| PSMD11  | -106.83 | -47.53 | 263 | 72.24 | 1.19  | Insensitive |
| PSMD9   | -32.5   | -9.7   | 126 | 69.05 | -1.03 | Insensitive |
| PSPC1   | -12.5   | -11.86 | 160 | 47.50 | -1.17 | Insensitive |
| PTCD3   | -11.7   | -4.47  | 66  | 56.06 | -1.01 | Insensitive |
| PTX3    | -23.9   | -8.56  | 145 | 51.72 | -1.07 | Insensitive |
| PWP1    | -31.7   | -22.08 | 168 | 63.10 | 1.15  | Insensitive |
| RAB36   | -3.3    | 0.14   | 40  | 67.50 | -1.11 | Insensitive |
| RBL2    | -49     | -10.45 | 137 | 77.37 | 1.19  | Insensitive |

|          |         |        |     |       |       |             |
|----------|---------|--------|-----|-------|-------|-------------|
| REXO1    | -47.45  | -23.68 | 95  | 88.42 | 1.07  | Insensitive |
| REXO4    | -64.6   | -30.07 | 200 | 74.00 | -1.12 | Insensitive |
| ROBO4    | -67.37  | -35.81 | 486 | 53.91 | -1.02 | Insensitive |
| RPAP1    | -9.8    | 0      | 117 | 64.10 | 1.04  | Insensitive |
| RRP12    | -32.12  | -14.23 | 112 | 53.57 | -1.08 | Insensitive |
| RRP1B    | -1.96   | -7.69  | 117 | 80.34 | -1.20 | Insensitive |
| RSPH3    | -47.28  | -4.96  | 190 | 68.42 | 1.16  | Insensitive |
| RWDD1    | -102.07 | -49.33 | 216 | 71.30 | -1.08 | Insensitive |
| SAP30BP  | -54.65  | -32.82 | 257 | 59.14 | -1.11 | Insensitive |
| SERGEF   | -34.6   | -15.06 | 152 | 79.61 | 1.13  | Insensitive |
| SF3A1    | -31.7   | -4.04  | 155 | 70.32 | 1.06  | Insensitive |
| SF3B2    | -16.4   | -8.7   | 49  | 71.43 | 1.19  | Insensitive |
| SGCB     | -70.45  | -32.77 | 223 | 77.13 | 1.13  | Insensitive |
| SGPP1    | -3.6    | -24.28 | 95  | 75.79 | 1.05  | Insensitive |
| SLBP     | -181.04 | -43.76 | 367 | 78.47 | 1.06  | Insensitive |
| SLC25A28 | -13.5   | -6.19  | 29  | 86.21 | -1.02 | Insensitive |
| SLC25A37 | -54.21  | -30.33 | 198 | 72.73 | 1.13  | Insensitive |
| SLC25A43 | -133.2  | -60.55 | 344 | 70.93 | 1.07  | Insensitive |
| SLC35F3  | -37.46  | -18.29 | 145 | 73.79 | 1.12  | Insensitive |
| SMARCA1  | -27.08  | -1.45  | 130 | 66.92 | -1.19 | Insensitive |
| SMG9     | -64.17  | -6.82  | 343 | 65.89 | -1.16 | Insensitive |
| SMYD4    | -57     | -24.71 | 168 | 75.00 | 1.01  | Insensitive |
| SNTB2    | -10     | -5.67  | 38  | 71.05 | 1.14  | Insensitive |
| SNUPN    | -48.77  | -23.71 | 283 | 57.95 | -1.15 | Insensitive |
| SNX1     | 0       | 0      | 14  | 64.29 | -1.04 | Insensitive |
| SNX6     | -12.2   | -6.37  | 31  | 80.65 | 1.14  | Insensitive |
| SOD1     | -39.87  | -8.23  | 148 | 63.51 | 1.08  | Insensitive |
| SP1      | -22.33  | -4.54  | 98  | 70.41 | -1.01 | Insensitive |
| SPAG7    | -6.82   | -4.86  | 68  | 58.82 | 1.14  | Insensitive |
| SPECC1   | 0       | 0      | 51  | 43.14 | -1.04 | Insensitive |
| SRP68    | -40.24  | -26.08 | 162 | 73.46 | 1.07  | Insensitive |
| SRSF7    | -29.23  | -11.84 | 238 | 60.08 | -1.08 | Insensitive |
| STK35    | -114.36 | -36.14 | 271 | 64.94 | -1.12 | Insensitive |
| STX18    | -7.11   | -3.4   | 64  | 76.56 | 1.09  | Insensitive |
| STX1A    | -2.7    | 0      | 27  | 85.19 | 1.17  | Insensitive |
| TAMM41   | -31.55  | -5.14  | 283 | 65.72 | -1.03 | Insensitive |
| TBC1D1   | -82.99  | -46.15 | 355 | 67.61 | -1.13 | Insensitive |
| TCEB3    | -99.28  | -64.92 | 271 | 76.75 | -1.02 | Insensitive |
| TCP1     | -87.95  | -29.91 | 281 | 66.55 | -1.05 | Insensitive |
| TERF2IP  | -34.7   | -13.98 | 97  | 63.92 | 1.04  | Insensitive |
| TEX2     | -18.35  | 0      | 85  | 68.24 | 1.02  | Insensitive |
| TMEM186  | -7      | -2.49  | 34  | 64.71 | 1.02  | Insensitive |
| TMEM206  | -68.2   | -35.82 | 138 | 73.19 | -1.03 | Insensitive |
| TMEM9B   | -206.59 | -34.99 | 460 | 70.87 | 1.05  | Insensitive |
| TMX3     | -108.7  | -60.74 | 317 | 65.30 | 1.19  | Insensitive |
| TNS1     | -117.27 | -52.97 | 453 | 64.02 | -1.18 | Insensitive |
| TOMM5    | -9.95   | -12.18 | 64  | 73.44 | -1.11 | Insensitive |

|          |         |        |     |       |       |             |
|----------|---------|--------|-----|-------|-------|-------------|
| TOP1MT   | -7      | -4.12  | 35  | 68.57 | -1.10 | Insensitive |
| TRAPPC11 | -51.43  | -31.68 | 202 | 68.32 | -1.13 | Insensitive |
| TRMT1    | -6.37   | -4.57  | 129 | 61.24 | -1.05 | Insensitive |
| TTC39C   | -98.1   | -52.1  | 236 | 78.39 | 1.15  | Insensitive |
| TTC8     | -2.87   | 0      | 46  | 73.91 | -1.09 | Insensitive |
| TUFT1    | -14.4   | -7.9   | 62  | 67.74 | 1.18  | Insensitive |
| TULP3    | 0       | 0      | 41  | 68.29 | -1.15 | Insensitive |
| TXNDC17  | -68.79  | -43.3  | 325 | 60.31 | 1.11  | Insensitive |
| TXNRD1   | -3.2    | -0.55  | 24  | 62.50 | -1.11 | Insensitive |
| UBA2     | -17.6   | -11.6  | 70  | 80.00 | -1.09 | Insensitive |
| UBAP2L   | -26.85  | -14.53 | 167 | 55.69 | -1.03 | Insensitive |
| UBR4     | 0       | 0      | 28  | 64.29 | 1.14  | Insensitive |
| UFC1     | -29.68  | -23.52 | 246 | 45.12 | 1.15  | Insensitive |
| URGCP    | -89.96  | -19.57 | 494 | 64.17 | -1.19 | Insensitive |
| USP13    | -47.8   | -39.53 | 471 | 77.71 | -1.16 | Insensitive |
| USP46    | -46.73  | -22.78 | 185 | 71.89 | -1.03 | Insensitive |
| VIM      | -65.22  | -22.1  | 413 | 63.20 | -1.13 | Insensitive |
| WDR76    | -17.2   | -13.06 | 70  | 72.86 | 1.11  | Insensitive |
| XPO5     | -57.4   | -16.04 | 211 | 74.88 | -1.03 | Insensitive |
| XRCC5    | -83.68  | -20.23 | 461 | 61.17 | -1.07 | Insensitive |
| ZBTB25   | -91.35  | -49.1  | 192 | 75.52 | 1.13  | Insensitive |
| ZC3HC1   | -14.7   | -4.21  | 85  | 58.82 | 1.04  | Insensitive |
| ZKSCAN3  | -22.41  | -18.82 | 216 | 57.41 | -1.00 | Insensitive |
| ZMIZ2    | -60.4   | -39.05 | 123 | 71.54 | 1.09  | Insensitive |
| ZNF346   | -10     | -8     | 43  | 65.12 | 1.01  | Insensitive |
| ZNF354C  | -117.99 | -67.05 | 306 | 71.57 | -1.19 | Insensitive |
| ZNF48    | -85.01  | -61.27 | 376 | 81.12 | -1.05 | Insensitive |
| ZNF668   | -93.9   | -55.38 | 684 | 57.60 | -1.19 | Insensitive |
| ZNF687   | -55.8   | -16.88 | 146 | 71.92 | -1.06 | Insensitive |
| ZYX      | -163.74 | -96.82 | 345 | 77.10 | 1.00  | Insensitive |



| Table S5   Table of vectors used in luciferase assays |                 |               |
|-------------------------------------------------------|-----------------|---------------|
| vector name                                           | 5'UTR           | parent vector |
| pMH2                                                  | N/A (CMV alone) | pGL4.25       |
| pCR300                                                | <i>CyclinD1</i> | pMH2          |
| pCR301                                                | <i>Rock1</i>    | pMH2          |
| pCR302                                                | <i>Pfn2</i>     | pMH2          |
| pCR303                                                | <i>Arf6</i>     | pMH2          |
| pCR304                                                | <i>Arf6mut</i>  | pMH2          |

Table S6 | Genes with reduced TE in the presence of INK128

| Gene name | log2(change in TE) | z-score (log2 (change in TE)) |
|-----------|--------------------|-------------------------------|
| AASS      | 0.515372161        | -2.0395347                    |
| AHCY      | 0.381309714        | -2.401865638                  |
| AKT1S1    | 0.653703097        | -1.665667305                  |
| ALDH9A1   | 0.429112605        | -2.272668635                  |
| ASNS      | 0.595163021        | -1.823883727                  |
| ATF4      | 0.685502922        | -1.579721832                  |
| ATG7      | 0.460978503        | -2.186544586                  |
| ATP5G3    | -0.064317838       | -3.606264427                  |
| ATPIF1    | 0.502521217        | -2.074266981                  |
| BCL3      | 0.482912569        | -2.127263327                  |
| BCORL1    | 0.610838431        | -1.781517754                  |
| BHLHE40   | 0.593750062        | -1.827702535                  |
| BRK1      | 0.527600913        | -2.006484019                  |
| BTBD2     | 0.530887913        | -1.997600235                  |
| CCNI      | 0.57492541         | -1.878579973                  |
| CCNL1     | 0.228752408        | -2.814182681                  |
| CDC5L     | 0.508880783        | -2.057078965                  |
| CERK      | 0.448981958        | -2.218967681                  |
| CIRBP     | 0.690557996        | -1.56605947                   |
| COX6C     | 0.508414235        | -2.058339905                  |
| CRTAP     | 0.254475902        | -2.744659724                  |
| CSRNP1    | 0.38389789         | -2.394870568                  |
| CTDSPL    | 0.664870654        | -1.635484719                  |
| CUL2      | 0.700818061        | -1.538329565                  |
| DENND1A   | 0.496502172        | -2.09053467                   |
| DIP2A     | 0.697422896        | -1.547505686                  |
| DLGAP4    | 0.698087521        | -1.545709403                  |
| DMWD      | 0.425077475        | -2.283574392                  |
| DNAJB1    | 0.637762038        | -1.708751249                  |
| ECSIT     | 0.592881792        | -1.830049211                  |
| EEF1A1    | -0.081836105       | -3.653611095                  |
| EEF1B2    | 0.40124211         | -2.347994297                  |
| EEF1D     | 0.166259321        | -2.983082916                  |
| EEF1G     | -0.653979552       | -5.199944735                  |
| EEF2      | -0.034649952       | -3.526080951                  |
| EGR1      | -0.067876474       | -3.615882362                  |
| EIF2S3    | 0.665826944        | -1.632900151                  |
| EIF3E     | 0.500802989        | -2.078910841                  |
| EIF3F     | 0.499692936        | -2.081910984                  |
| EIF3H     | 0.18850202         | -2.922967514                  |
| EIF3L     | 0.149025969        | -3.029659543                  |
| EIF4B     | 0.528458273        | -2.00416683                   |
| EXOC3     | 0.298924632        | -2.624528022                  |
| FAM160B2  | 0.584498981        | -1.852705457                  |
| FASN      | 0.339551358        | -2.514726059                  |
| FTH1      | -0.23187713        | -4.059127378                  |

|           |              |              |
|-----------|--------------|--------------|
| FTL       | -0.482845172 | -4.737419384 |
| G0S2      | 0.472929654  | -2.154244178 |
| GADD45A   | 0.51619605   | -2.037307973 |
| GADD45B   | 0.447799212  | -2.222164292 |
| GAMT      | 0.361140657  | -2.456376603 |
| GAPDH     | 0.521495419  | -2.022985354 |
| GLTSCR2   | -0.282271408 | -4.19532813  |
| GLUL      | 0.479862971  | -2.135505484 |
| GNB2L1    | 0.23608559   | -2.79436327  |
| GSG2      | -0.839007043 | -5.700019035 |
| HIST1H1C  | 0.690761053  | -1.565510668 |
| HIST1H1E  | 0.536462713  | -1.982533208 |
| HIST1H2AB | 0.084054103  | -3.205259181 |
| HIST1H2AC | 0.141741579  | -3.049347084 |
| HIST1H2AG | -0.143710514 | -3.820839227 |
| HIST1H2AH | 0.148467388  | -3.031169222 |
| HIST1H2AI | 0.202009418  | -2.886461032 |
| HIST1H2AJ | 0.263397961  | -2.720546051 |
| HIST1H2AK | 0.123703321  | -3.098099132 |
| HIST1H2AM | 0.704435747  | -1.528552035 |
| HIST1H2BB | 0.023022406  | -3.370209714 |
| HIST1H2BC | -0.124527712 | -3.768993816 |
| HIST1H2BD | 0.032080481  | -3.34572843  |
| HIST1H2BE | 0.0048643    | -3.419285676 |
| HIST1H2BJ | -0.022009033 | -3.491916305 |
| HIST1H2BK | 0.005526469  | -3.41749603  |
| HIST1H2BL | -0.134517661 | -3.795993678 |
| HIST1H2BM | -0.284579931 | -4.201567381 |
| HIST1H2BN | 0.043257137  | -3.315521251 |
| HIST1H2BO | 0.086075273  | -3.199796559 |
| HIST1H3A  | -0.007089192 | -3.451592411 |
| HIST1H3B  | 0.120455075  | -3.106878176 |
| HIST1H3C  | 0.18618935   | -2.929217973 |
| HIST1H3H  | -0.158673708 | -3.861280292 |
| HIST1H3J  | -0.131141283 | -3.786868332 |
| HIST1H4A  | -0.022874327 | -3.494254938 |
| HIST1H4B  | -0.101136414 | -3.705774092 |
| HIST1H4C  | 0.017922981  | -3.383991943 |
| HIST1H4H  | 0.127767249  | -3.087115543 |
| HIST1H4J  | -0.061787609 | -3.59942597  |
| HIST1H4K  | -0.090411681 | -3.676788327 |
| HIST2H2AB | 0.578927694  | -1.867762989 |
| HIST2H2AC | 0.469507436  | -2.163493416 |
| HIST2H2BE | 0.135952249  | -3.064993922 |
| HIST2H2BF | 0.095403083  | -3.174586262 |
| HIST2H3D  | -0.138777005 | -3.807505419 |
| HIST4H4   | 0.101804121  | -3.157286159 |
| HMGA1     | 0.622346315  | -1.750415365 |
| HNRNPA1   | 0.407312141  | -2.331588808 |

|         |              |              |
|---------|--------------|--------------|
| HNRNP2  | 0.442148449  | -2.237436624 |
| HSPG2   | 0.608509473  | -1.787812235 |
| IER2    | 0.48752991   | -2.114784027 |
| IER3    | 0.377543704  | -2.412044043 |
| IFI16   | 0.708722419  | -1.516966435 |
| IFRD1   | -0.201998716 | -3.978374908 |
| IGBP1   | 0.646955565  | -1.683903878 |
| IMPDH2  | 0.669181035  | -1.623835041 |
| JUNB    | 0.478030815  | -2.140457257 |
| KLF10   | 0.265737587  | -2.714222738 |
| LGALS1  | 0.66033614   | -1.647740162 |
| MAN2B1  | 0.640596831  | -1.701089646 |
| ME3     | 0.705006429  | -1.527009651 |
| MECOM   | 0.366454641  | -2.442014484 |
| MIDN    | 0.62847093   | -1.733862351 |
| MKLN1   | 0.599480156  | -1.812215795 |
| MPST    | 0.617218743  | -1.764273668 |
| MTA1    | 0.699371763  | -1.542238478 |
| MTMR12  | 0.147019402  | -3.035082697 |
| MTMR4   | 0.653231976  | -1.666940605 |
| NAP1L1  | 0.595638598  | -1.822598384 |
| NFKBIA  | 0.663634847  | -1.638824738 |
| NFKBIZ  | 0.078553631  | -3.220125322 |
| NOA1    | 0.622476906  | -1.750062416 |
| NTMT1   | 0.702174808  | -1.534662681 |
| NUAK2   | 0.517484928  | -2.033824519 |
| ODC1    | 0.671141203  | -1.618537289 |
| OSTC    | 0.53645977   | -1.982541162 |
| PABPC1  | -0.856197574 | -5.74647993  |
| PCBP2   | 0.561050026  | -1.916081011 |
| PFDN5   | 0.390049765  | -2.378243878 |
| PNPLA6  | 0.566814611  | -1.900501051 |
| PRKCI   | 0.664776836  | -1.635738281 |
| PRPS2   | 0.389325027  | -2.38020263  |
| PRR11   | 0.566515319  | -1.901309949 |
| PSAT1   | 0.639474723  | -1.70412237  |
| PTEN    | 0.618051916  | -1.762021849 |
| QARS    | 0.541325208  | -1.96939133  |
| RAB13   | 0.641574365  | -1.698447662 |
| RABGGTB | 0.350308436  | -2.485652876 |
| RASSF7  | 0.700975863  | -1.537903073 |
| RBBP4   | 0.599079809  | -1.813297814 |
| RNF130  | 0.705728941  | -1.525056916 |
| RPL10   | 0.085950646  | -3.200133389 |
| RPL10A  | 0.42569437   | -2.281907108 |
| RPL11   | -0.455321888 | -4.66303213  |
| RPL12   | -0.888154455 | -5.832849878 |
| RPL13   | -0.13915362  | -3.808523297 |
| RPL13A  | -0.34415006  | -4.36256773  |

|        |              |              |
|--------|--------------|--------------|
| RPL14  | 0.465864032  | -2.173340454 |
| RPL15  | 0.060996083  | -3.267578154 |
| RPL18  | 0.147019791  | -3.035081646 |
| RPL18A | -0.556498233 | -4.936481711 |
| RPL19  | 0.504792863  | -2.068127397 |
| RPL22  | 0.160557898  | -2.998492168 |
| RPL23  | -0.030828091 | -3.515751597 |
| RPL23A | 0.091896455  | -3.184063635 |
| RPL24  | 0.675473743  | -1.606827722 |
| RPL26  | -0.703112067 | -5.332735316 |
| RPL27  | 0.402928004  | -2.343437827 |
| RPL27A | -0.208171869 | -3.995059105 |
| RPL28  | -0.354925074 | -4.391689389 |
| RPL29  | -0.168506136 | -3.887854422 |
| RPL3   | -0.291901526 | -4.221355476 |
| RPL30  | 0.019488821  | -3.379759943 |
| RPL31  | -0.689485049 | -5.295905538 |
| RPL32  | -0.031707175 | -3.5181275   |
| RPL34  | -0.455485437 | -4.663474154 |
| RPL35  | 0.131784083  | -3.076259235 |
| RPL35A | 0.151980188  | -3.021675168 |
| RPL36  | 0.157756394  | -3.0060638   |
| RPL37  | -0.369045847 | -4.429853641 |
| RPL37A | -0.142784497 | -3.818336478 |
| RPL39  | -0.17468209  | -3.904546189 |
| RPL4   | 0.370444445  | -2.43123123  |
| RPL41  | 0.291959604  | -2.643352422 |
| RPL5   | 0.304937075  | -2.608278176 |
| RPL6   | 0.358856591  | -2.462549754 |
| RPL7   | -0.303516199 | -4.252746484 |
| RPL7A  | 0.202521201  | -2.885077835 |
| RPL8   | 0.290008941  | -2.648624484 |
| RPL9   | -0.02789642  | -3.507828162 |
| RPLP0  | -0.714836678 | -5.364423454 |
| RPLP1  | -0.722811299 | -5.385976484 |
| RPLP2  | 0.002934486  | -3.424501389 |
| RPS10  | -0.165526796 | -3.879802151 |
| RPS11  | -0.327114019 | -4.316524376 |
| RPS12  | -0.996375867 | -6.125340181 |
| RPS13  | 0.041024394  | -3.321555692 |
| RPS14  | -0.053667237 | -3.577479019 |
| RPS15  | 0.459748549  | -2.189868786 |
| RPS15A | 0.099822792  | -3.162641103 |
| RPS16  | -0.100841846 | -3.704977962 |
| RPS18  | -1.070227344 | -6.324938768 |
| RPS19  | -0.638198856 | -5.157294205 |
| RPS2   | -0.659948995 | -5.216078365 |
| RPS20  | -0.090437308 | -3.676857589 |
| RPS21  | -0.176664748 | -3.909904724 |

|           |              |              |
|-----------|--------------|--------------|
| RPS23     | -0.05994671  | -3.594450568 |
| RPS24     | -0.490941625 | -4.759301689 |
| RPS25     | 0.017329264  | -3.385596584 |
| RPS26     | 0.697016628  | -1.548603708 |
| RPS27     | -0.875204843 | -5.797850927 |
| RPS27A    | -0.013277107 | -3.468316505 |
| RPS28     | -0.274810052 | -4.175162303 |
| RPS29     | -0.207116507 | -3.992206776 |
| RPS3      | -0.160188939 | -3.865375511 |
| RPS3A     | -0.690391791 | -5.298356192 |
| RPS4X     | 0.047530492  | -3.303971643 |
| RPS5      | -0.387931976 | -4.480897232 |
| RPS6      | -0.194281617 | -3.957517884 |
| RPS7      | 0.53953441   | -1.974231324 |
| RPS8      | 0.081781073  | -3.211402505 |
| RPS9      | -0.251601967 | -4.112437749 |
| RPSA      | -0.51552888  | -4.82575373  |
| SHMT2     | 0.595588827  | -1.8227329   |
| SLC25A1   | 0.688213473  | -1.572396019 |
| SLIRP     | 0.582427728  | -1.858303438 |
| SNRPD2    | 0.593938005  | -1.827194581 |
| SORT1     | 0.637260793  | -1.710105965 |
| SPATS2L   | 0.637176577  | -1.710333576 |
| STAG1     | 0.697812249  | -1.546453381 |
| SUCLG1    | 0.700189144  | -1.540029341 |
| TAF6L     | 0.644524581  | -1.690474105 |
| TAOK1**   | 0.490896854  | -2.105684178 |
| TBC1D16   | 0.530782325  | -1.997885608 |
| TBCA      | 0.369125813  | -2.4347951   |
| TBCC      | 0.651668901  | -1.671165132 |
| TFPI      | 0.602394801  | -1.804338376 |
| TKT       | 0.584451965  | -1.852832527 |
| TMEM258   | -0.120889753 | -3.759161495 |
| TNFRSF10D | 0.349653114  | -2.487424016 |
| TPM4      | 0.161990985  | -2.994618959 |
| TPT1      | -0.868682011 | -5.780221651 |
| TRIB3     | 0.358573618  | -2.463314546 |
| TROAP     | 0.588405167  | -1.842148197 |
| TSC2      | 0.629396075  | -1.731361959 |
| UBA52     | 0.418625461  | -2.301012268 |
| UCP2      | 0.525172512  | -2.013047265 |
| UQCC2     | 0.100237135  | -3.161521257 |
| UQCRB     | 0.488362294  | -2.112534341 |
| UQCRH     | 0.607242363  | -1.791236857 |
| VPS51     | 0.670526226  | -1.620199389 |
| YBX1      | 0.096422693  | -3.171830559 |
| YBX3      | 0.29096718   | -2.646034649 |
| ZC3H12A   | -0.055790523 | -3.58321763  |
| ZMYM3     | 0.550212414  | -1.945371854 |

|        |             |              |
|--------|-------------|--------------|
| ZNF358 | 0.390291796 | -2.377589741 |
| ZNF644 | 0.390368078 | -2.377383573 |

\*\*TAOK1 also has reduced TE in the presence of Silvestrol
