# Supplementary material for: Transcriptome-wide characterization of the eIF4A signature highlights plasticity in translation regulation
Source: PubMed Central journal article supplement (PMC4203936; doi:10.1186/s13059-014-0476-1), 2014-10-02

Figure S2

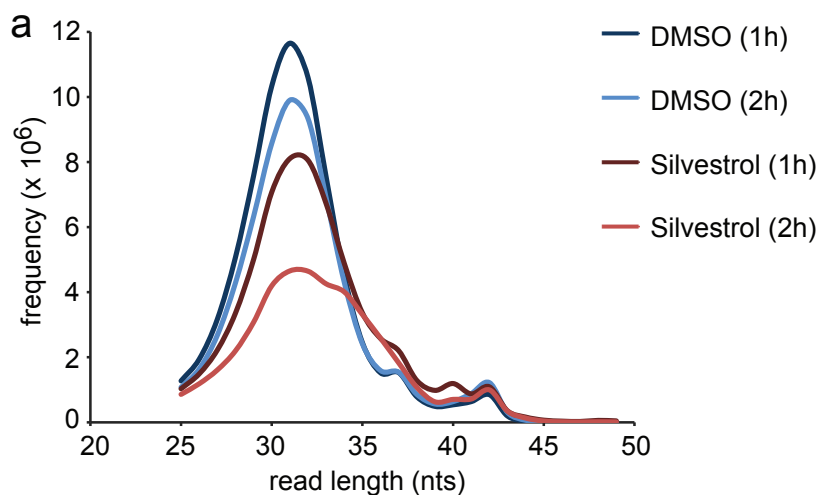

**b**

**Sequencing statistics**

| Treatment            | time (h) | Sample Type | # Reads Uniquely Aligned to hg19 | # Genes with Uniquely Aligned Reads | Coverage |
|----------------------|----------|-------------|----------------------------------|-------------------------------------|----------|
| DMSO 1h              | 1        | RF          | 65143689                         | 13934                               | 28.60223 |
| DMSO 2h              | 2        | RF          | 56923624                         | 13682                               | 25.3876  |
| Silvestrol 1h        | 1        | RF          | 51983795                         | 13592                               | 22.00118 |
| Silvestrol 2h        | 2        | RF          | 30914031                         | 13293                               | 13.40676 |
| DMSO 2h (b.r.)       | 2        | RF          | 12146133                         | 13024                               | 6.440487 |
| Silvestrol 2h (b.r.) | 2        | RF          | 5637746                          | 12267                               | 3.407237 |
| DMSO mRNA            | 0        | mRNA        | 79584197                         | 17703                               | 46.22767 |
| Silvestrol 2h mRNA   | 2        | mRNA        | 41992429                         | 17272                               | 21.21635 |

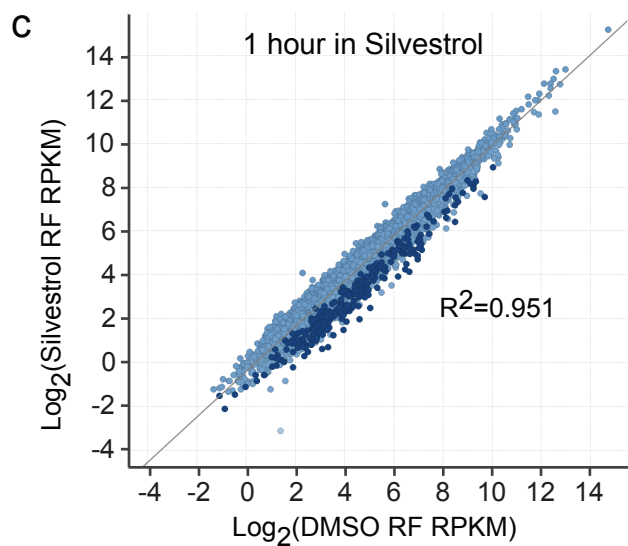

Supplement: 13059_2014_476_MOESM3_ESM.pdf [file 13059_2014_476_MOESM3_ESM.pdf]
