# Supplementary material for: Transcriptome-wide characterization of the eIF4A signature highlights plasticity in translation regulation
Source: PubMed Central journal article supplement (PMC4203936; doi:10.1186/s13059-014-0476-1), 2014-10-02

Figure S5

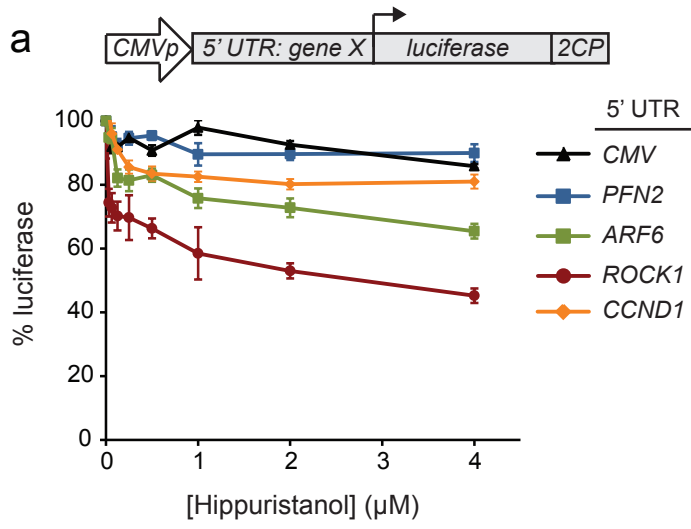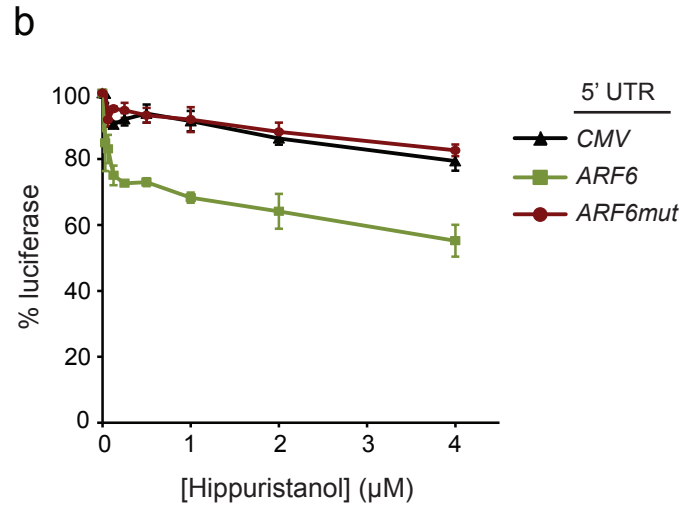

Supplement: 13059_2014_476_MOESM6_ESM.pdf [file 13059_2014_476_MOESM6_ESM.pdf]
